1 **Identifying Biomarkers of Retinal Pigment Epithelial Cell Stem Cell-**  
2 **derived RPE Cell Heterogeneity and Transplantation Efficacy**

3

4 Farhad Farjood<sup>1</sup>, Justine D. Manos<sup>2</sup>, Yue Wang<sup>1</sup>, Anne L. Williams<sup>1</sup>, Cuiping Zhao<sup>3</sup>, Susan  
5 Borden<sup>1</sup>, Nazia Alam<sup>4</sup>, Glen Prusky<sup>4</sup>, Sally Temple<sup>1</sup>, Jeffrey H. Stern<sup>1,5</sup>, Nathan C. Boles<sup>1,5,\*</sup>

6

7 <sup>1</sup> Neural Stem Cell Institute, Rensselaer NY 12144.

8 <sup>2</sup> Current address: Abbvie, Cambridge Research Center, 200 Sidney Street, Cambridge,  
9 Massachusetts, USA 02139

10 <sup>3</sup> Current address: Regeneron Pharmaceuticals. 81 Columbia Turnpike. Rensselaer, NY 12144

11 <sup>4</sup> Burke Neurological Institute at Weill Cornell Medicine, White Plains, NY 10605

12 <sup>5</sup> Co-senior authors.

13

14 \*Correspondence: [nathanboles@neuralsci.org](mailto:nathanboles@neuralsci.org)

## 15 **Summary**

16 Transplantation of retinal pigment epithelial (RPE) cells holds great promise for patients  
17 with retinal degenerative diseases such as age-related macular degeneration. In-depth  
18 characterization of RPE cell product identity and critical quality attributes are needed to enhance  
19 efficacy and safety of replacement therapy strategies. Here we characterized an adult RPE  
20 stem cell-derived (RPESC-RPE) cell product using bulk and single cell RNA sequencing (sc-  
21 RNA-seq), assessing functional cell integration *in vitro* into a mature RPE monolayer and *in vivo*  
22 efficacy by vision rescue in the Royal College of Surgeons rats. scRNA-seq revealed several  
23 distinct subpopulations in the RPESC-RPE product, some with progenitor markers. We  
24 identified RPE clusters expressing genes associated with *in vivo* efficacy and increased cell  
25 integration capability. Gene expression analysis revealed a lncRNA (TRES) as a predictive  
26 marker of *in vivo* efficacy. TRES knockdown decreased cell integration while overexpression  
27 increased integration *in vitro* and improved vision rescue in the RCS rats.

## 28 **Introduction**

29 The retinal pigment epithelium (RPE) supports the overlying neural retinal photoreceptor  
30 cells that initiate vision. RPE cells provide nourishment, phagocytose photoreceptor cell outer  
31 segments, recycle components of the visual cycle, absorb scattered light, regulate ionic  
32 homeostasis and contribute to the blood-retinal barrier (Sparrow et al., 2010; Strauss, 2005). In  
33 age-related macular degeneration (AMD), RPE cells undergo changes in morphology,  
34 proteome, and phagocytic capacity, resulting in dysfunction, cell death and vision loss (Gu et al.,  
35 2012; Kopitz et al., 2004; Lin et al., 2011; Vives-Bauza et al., 2008). RPE replacement therapies  
36 are under development to treat AMD using embryonic stem cell (ESC)- and induced pluripotent  
37 stem cell (iPSC)-derived RPE cells, which have shown promise to rescue vision in animal  
38 models and in patients in early clinical trials (da Cruz et al., 2018; Mandai et al., 2017; Sharma  
39 et al., 2019). Adult RPE stem cell (RPESC)-derived RPE progeny (RPESC-RPE) are another  
40 stem cell-derived source of RPE cells for transplantation to treat AMD (Salero et al., 2012). In  
41 our previous work, we showed that subretinal transplantation of a suspension of RPESC-RPE  
42 cells in the Royal College of Surgeons (RCS) rat can preserve vision in this model of retinal  
43 degeneration (Davis et al., 2017). A clinical trial of RPESC-RPE transplantation for non-  
44 exudative (dry) AMD is underway (NCT04627428).

45

46 An important step to characterize the identity of cell products for transplantation is to  
47 describe the extent of cellular heterogeneity. RPE cells have been traditionally considered a  
48 homogenous cell population composed of one cell type, but accumulating evidence points  
49 towards RPE cellular diversity (Voigt et al., 2019; Xu et al., 2021). Differences in RPE cell  
50 behavior, appearance, and gene expression suggest cellular diversity in the native RPE layer  
51 and in stem cell-derived RPE preparations (Cuomo et al., 2020; Ortolan et al., 2022; Whitmore et  
52 al., 2014). Previously, we showed that transplantation of RPESC-RPE cells cultured for  
53 approximately 4 weeks after thaw from the master cell bank (MCB) is more effective at vision  
54 rescue compared to earlier and later time points of *in vitro* differentiation. The molecular  
55 mechanisms underlying improved effectiveness of transplants at the 4-week stage of  
56 differentiation, however, were unknown.

57 Here we use single cell and bulk RNA sequencing to investigate the heterogeneity of  
58 RPESC-RPE cells and the underlying molecular signatures that confer transplantation efficacy.  
59 Our bioinformatic analyses revealed a transcriptomic signature that correlated with successful  
60 transplantation. Furthermore, the data revealed a remarkable heterogeneity of RPESC-RPE cell  
61 identities, each with a distinct gene expression signature, indicating that multiple, previously  
62 unrecognized cell subpopulations are present in the RPESC-RPE product, including a subset of  
63 cells with potentially improved chance of integrating into the host RPE after transplantation.  
64 Finally, we identified a novel long noncoding RNA (lncRNA) TREX as a biomarker of transplant  
65 efficacy in the RCS rat. These findings broaden our understanding of RPE cell product identity  
66 and critical quality attributes (CQAs) needed to enhance regenerative approaches to treat RPE  
67 dysfunction and vision loss.

## 68 **Results**

### 69 **Bulk RNA-seq uncovers a transplant efficacy gene signature**

70 We sought to determine genes associated with efficient RPE cell transplantation  
71 by comparing the transcriptome of RPESC-RPE cultures over an eight-week time course,  
72 following our earlier work indicating that the 4-week developmental stage of RPESC is more  
73 suitable for transplantation than 2-week or 7-8 week cells (Davis et al., 2017). We utilized the  
74 same RPE lines from the earlier study with previously established transplantation effects or a  
75 transplant status that could be predicted based on the transplant status of neighboring samples  
76 in the timeline (lines 228, 229 and 230; Fig. 1A-B). In addition, we isolated RPE from a fourth  
77 donor (line 233) for the experiments. During culture of each RPE line, we collected RNA at the

78 2, 3, 4, 5, 7, and 8-week time points for library preparation and sequencing. The data were then  
79 mapped using STAR aligner (Dobin et al., 2013) (Table S1). We accounted for cell line to cell  
80 line variance by batch correction using combat-seq (Zhang et al., 2020); (note that the RPE line  
81 233 at the 4-week time point had much lower counts and that timepoint was discarded from  
82 subsequent analysis).

83 We selected the 4000 most variable genes in the whole bulk-RNA-seq dataset and  
84 utilized the Singular Value Decomposition (SVD) approach to examine the relationship of  
85 samples to each other. Even though previously we utilized weeks in culture as a surrogate  
86 measure to separate groups by transplantation efficacy (Davis et al., 2017), the SVD results did  
87 not support time in culture as a good variable for grouping samples (Fig. 1C). However, utilizing  
88 the known and predicted transplant status of the samples clearly separated them into three  
89 groupings based on transplantation status: 2-week non-efficacious cultured RPE cells (W2-NE),  
90 Efficacious RPE (EFF-RPE), or Non-Efficacious RPE (NE-RPE) (Fig. 1D). Using this grouping,  
91 we proceeded to look for differential gene expression to identify potential biomarkers of  
92 transplant efficacy. We used the general linear model approaches in the edgeR and DESeq2  
93 packages to identify differentially expressed genes (DEGs), and included genes identified by  
94 both approaches for additional confidence. There were 1465 DEGs with approximately 14%  
95 being long-noncoding RNAs (lncRNAs) (Fig. 1E, Table S2). We next determined the extent to  
96 which these genes were associated with a transplant group based on their maximum expression  
97 and found that the majority of coding DEGs were associated with the W2-NE group (Fig. 1F)  
98 while the lncRNA DEGs were associated with each group in roughly equal numbers (Fig. 1G).  
99 Proportionately, the lncRNAs made up a much larger fraction of the DEGs in both the EFF-RPE  
100 and the NE-RPE. This result is consistent with previous studies on heart cells that highlighted  
101 the tissue specificity of lncRNAs; suggesting that these genes may distinguish between groups  
102 based on transplant efficacy (Lee et al., 2011).

103 To gain insight into the biological processes differing between RPE cultures from the  
104 W2-NE, EFF-RPE and NE-RPE groups we performed enrichment analysis using the goseq  
105 package (Young et al., 2010) (Table S3). Following the GO enrichment testing, semantic  
106 similarity analysis (Sayols 2020) was used to group terms (Fig. 1H). Similarly, we performed  
107 enrichment for REACTOME pathways (Fig. 1I; Table S4). Some of the most over-represented  
108 GO parent terms and REACTOME pathways were associated with proliferation and  
109 developmental processes, supporting the concept that the RPESCs are undergoing  
110 developmental processes during cell culture and that the cells reach a specific point of



111 intermediate maturation that is ideal for transplantation. However, as demonstrated by our SVD  
112 analysis (Fig. 1C,D), time in culture is an imperfect measure of transplant efficacy. One  
113 possibility is that as the RPESC cultures develop, multiple subpopulations arise, with one or  
114 more subpopulations more effectively conferring transplantation efficacy, and that exactly when  
115 those subpopulations arise, and their duration shows variability over time.

### 116 **Single cell sequencing reveals changes in RPE heterogeneity over time**

117 We next sought to identify if changes in RPE subpopulations influence transplant  
118 efficacy. For these experiments, P2 RPESC cells were cultured for 2, 4, and 8 weeks using the  
119 same methodology as for the bulk RNA-seq experiments described above. The ICELL8 platform  
120 (Takara) was used to isolate single RPE cells and generate libraries for sequencing with  
121 Illumina NovaSeq 6000. Data were processed and mapped with the Cogent NGS Analysis  
122 Pipeline (Takara) utilizing the STAR aligner (Dobin et al., 2013). The mapped data was then  
123 analyzed using the Seurat (v3) package in R and normalization was performed using the  
124 SCTransform pipeline (Hafemeister and Satija, 2019). The dataset was analyzed, and 13  
125 clusters (decreasing in size from 0 to 12) representing subpopulations of RPE cells (Fig. 2A)  
126 were discovered. All clusters contained cells from all time points (Fig. 2B), but the subpopulation  
127 composition of the whole RPE population changed with time in culture (Fig. 2C). Subpopulations  
128 were identified as RPE cells based on expression of previously identified human RPE cell  
129 signature genes (Bennis et al., 2015; Strunnikova et al., 2010); all RPE cell clusters  
130 demonstrated expression of the majority (136-163/171, 79-95%) of RPE signature genes,  
131 underscoring the RPE identity of the subpopulations (Fig. S1).

132 To identify genes associated with each cluster, we used the FindAllMarkers function  
133 from the Seurat package in R (Fig. 2D, Table S6). Each cluster was associated with between 6  
134 (cluster 11) and 1967 (cluster 10) genes with a median of 300 genes across clusters (Fig. 2D;  
135 Table S5). RPE associated genes such as *RPE65* and *BEST1* demonstrated differential  
136 expression across the subpopulations. *BEST1*, which has known variable expression levels  
137 between central and peripheral retina (Mullins et al., 2007), has higher expression in cluster  
138 2,3,8,9 and *RPE65* showed a similar expression pattern but with increased expression in cluster  
139 7 rather than cluster 9. Transthyretin (*TTR*), which is highly expressed in the RPE of rats and  
140 primates (Cavallaro et al., 1990; Pfeffer et al., 2004), also demonstrated variable expression,  
141 with cluster 3 having the highest expression followed by cluster 8. *CXCL14*, an immune  
142 regulator (Lu et al., 2016) with growth factor activity (Augsten et al., 2009), is highly expressed  
143 by RPE cells in the macular region (Whitmore et al., 2014) and demonstrated higher expression

144 in clusters 7 and 5 suggesting a potential macular phenotype for these clusters. Overall, the  
145 results support prior work indicating that the RPE layer contains a more heterogenous  
146 population of cells than previously considered (Xu et al., 2021).

### 147 **Enrichment analysis reveals RPE subpopulation functional specialization**

148 GO and REACTOME pathway enrichment with the hypeR package were utilized to  
149 uncover high-level functional differences among the RPE subpopulations (Table S6, S7). The  
150 number of enriched GO categories per cluster ranged from 18 categories in cluster 4 to 465  
151 categories in cluster 10, with a median of 76 enriched categories per cluster. After GO  
152 enrichments were calculated, a semantic similarity analysis for the enriched terms was  
153 performed to group the terms together and assist in visualizing and summarizing the analysis  
154 (Fig. 2E; Table S6). For visualizing the signaling pathway enrichments we utilized the Reactome  
155 pathways database (v72), which is arranged into multiple hierarchical trees composed of related  
156 pathways. For our analysis, we took the top-level terms in the trees and counted the number of  
157 enriched pathways under those terms (Fig. 2F; Table S7). The number of enriched pathways for  
158 each cluster ranged from 0 in cluster 9 to 329 in cluster 10 with a median of 12 enriched  
159 pathways per cluster.

160 Most clusters showed enrichment for 'homeostatic processes', 'intracellular transport',  
161 and 'sensory organ development' GO categories as well as metabolism- and signaling-related  
162 REACTOME pathways (Fig. 2E-F; Table S7-S8), as expected given the role of RPE to maintain  
163 the retinal microenvironment. Cluster 0 (~20% of cells) demonstrated strong enrichments for  
164 metabolic pathways and pathways involved in protein and ion transport. Cluster 1 (~17% of  
165 cells) also demonstrated enrichment for pathways associated with metabolism and GO terms  
166 associated with metabolism and molecule transport. Cluster 2 (~9% of cells) showed  
167 enrichment in a broader number of GO categories ranging from 'homeostatic process', and 'ion  
168 transport' to 'growth', 'neurogenesis' and a variety of development-related terms. Cluster 2 is  
169 enriched for many REACTOME pathways associated with 'signal transduction', indicating these  
170 RPE cells are likely reactive to environmental challenges and may have a particularly active role  
171 in regulating the retinal microenvironment. Cluster 3 (~8% of cells) had a similar enrichment  
172 profile to cluster 2, however cluster 3 had less enrichment in developmental pathways and an  
173 increased enrichment for metabolic and response to stress functions. In contrast, Cluster 4  
174 (~8% of cells) enriched for fewer GO terms and pathways and the enriched functions were  
175 focused on metabolic activities. Together these 5 clusters make up more than 60% of the RPE  
176 cells sequenced; they show a spectrum of functions, with cluster 4 being highly metabolic,

177 cluster 2 being highly reactive and clusters 0, 1, and 3 falling between these categories of  
178 function.

179 The pathway enrichments in the remaining clusters also revealed specialization in  
180 function. Clusters 5 and 7 showed very similar patterns of enrichment in the GO and pathway  
181 analysis for functions associated with locomotion and morphogenesis. The enrichment profile of  
182 these clusters could be indicative of subpopulations that could successfully integrate into a RPE  
183 monolayer. Notably, cell cycle was substantially enriched in Clusters 6 and 10, indicating these  
184 may be proliferative subpopulations. Clusters 6 and 10 were also enriched in signal  
185 transduction, and immune and cytokine responses. These clusters are similar to cluster 2 in that  
186 they have enrichment profiles with a significant developmental component that could be  
187 indicative of populations that benefit cell manufacture and transplantation. Cluster 8 was  
188 enriched for functions of molecule transport and stress response. Clusters 9 and 11 were not  
189 enriched for any functions and both had few marker genes. Cluster 12, which also had a small  
190 number of marker genes, did show enrichment for functions associated with metabolic activities  
191 and cation transport. Overall, the RPE subpopulations have overlapping, but distinct functional  
192 profiles. Based on the enrichment data, several clusters are candidate subpopulations for  
193 efficacious transplantation.

194 **Intersection of scRNA-seq and bulk RNA-seq data implicates three clusters that are more**  
195 **likely to confer transplantation efficacy.**

196 To gain a better understanding of which subpopulations may play a role in  
197 transplantation efficacy, we intersected the DEGs correlating positively or negatively with  
198 efficiency (Bulk-Eff) from the bulk RNA-seq data with the single cell RNA-seq data. Two sets of  
199 DEGs were determined using the FindAllMarkers function in Seurat: the first set was DEGs  
200 across the 2-, 4- and 8-week culture timepoints (Time-SC) (Table S8) and the second set were  
201 DEGs across the clusters (Cluster-SC) (Table S5). Forty-five percent of the Bulk-Eff DEGs  
202 intersected with at least one of the two gene sets from the scRNA-seq data (Fig. 3A). As  
203 expected, the Bulk-Eff DEGs were most abundantly expressed in the single-cell data at the 4-  
204 week timepoint (Fig. 3B). Importantly, when we compared the Bulk-Eff DEGs to the Cluster-SC  
205 data, we found that the genes associated with efficacy were most abundantly expressed in  
206 clusters 2, 6 and 10 (Fig. 3C). As noted in the previous section, clusters 2, 6, and 10 were  
207 enriched for a variety of functions related to development, environmental reactivity, and, notable  
208 in cluster 10, proliferation. This enrichment profile along with the large number of marker genes

209 associated with transplant efficacy make these three subpopulations the lead candidates for  
210 playing a key role in successful engraftment and vision rescue after transplantation.

211         Following up on this discovery, we intersected the markers of clusters 2, 6 and 10 with  
212 the Bulk-Eff DEGs and performed GO (Fig. 3D; Table S9) and REACTOME pathway (Fig. 3E;  
213 Table S10) enrichment analyses on the intersected gene list for each cluster. The GO analysis  
214 revealed some striking differences in the intersected genes from the selected subpopulations  
215 (Fig. 3D,E) when compared to the overall cluster GO and REACTOME data (Fig. 2E,F). The  
216 intersected gene set from Cluster 10 was highly enriched for terms dealing with proliferation and  
217 cell organization. The cluster 2 intersected gene set was enriched for several terms dealing with  
218 metabolism and homeostatic processes. On the other hand, the intersected genes from cluster  
219 6 were more specifically enriched for terms related to development and cell differentiation than  
220 the total cluster 6 marker genes. In the Reactome analysis, the cluster 2 intersected gene set  
221 was enriched for either pathways related to vision or sensing external stimuli. The cluster 6  
222 intersected gene set was enriched for developmental pathways and pathways dealing with the  
223 extracellular matrix (ECM), and specifically for pathways interacting with ECM components and  
224 for degrading the matrix (Table S9). This cluster 6 enrichment profile may suggest a  
225 subpopulation capable of breaking down and integrating into the RPE monolayer. The cluster 10  
226 intersected gene set was again highly enriched for proliferation pathways. Overall, this data  
227 analysis reveals that three subpopulations of RPE cells, clusters 2, 6 and 10, have gene  
228 expression correlating with properties that could contribute to efficacious transplantation.

### 229 **Cluster 10, but not Cluster 2 RPE subpopulations can integrate into an RPE monolayer**

230         The adult RPESC-RPE product is subretinally injected as a cell suspension to enable  
231 the possibility of cells integrating into the existing RPE monolayer *in vivo*. As a surrogate of the  
232 cell integration process, we developed an *in vitro* assay (Fig. S2). The assay workflow begins by  
233 culturing RPE test cells and labeling these with GFP. Then approximately 12,000 GFP+ test  
234 cells are plated onto a pre-existing 8-week-old RPE monolayer grown in 24-well Transwell  
235 format; at the 8-week stage, the monolayers are highly polarized and exhibit typical mature RPE  
236 cobblestone morphology that serves as an *in vitro* model of the native RPE layer. Seven days  
237 after plating the GFP+ labeled test cells on the mature RPE monolayer, the cultures are fixed  
238 and imaged by confocal microscopy over a pre-set 20 position grid covering approximately 4%  
239 of the Transwell surface. GFP+ cells that integrate into the mature GFP-negative monolayer are  
240 then counted and the percentage of integrated cells are calculated.

241 We performed this *in vitro* integration assay by plating 4-week-old GFP labelled RPESC-  
242 RPE test cultures on mature monolayers. To determine if integrating cells came from a  
243 particular subpopulation, we identified markers for our candidate cluster 2 (YEATS2) and cluster  
244 10 (EZH2) subpopulations and used confocal immunofluorescence to determine if the integrated  
245 cells expressed either marker along with GFP. Our results showed that ~90% of EZH2+ cells  
246 present in the original suspension had integrated into the RPE monolayer. Cluster 10 only  
247 makes up ~3% of the original 4-week RPESC-RPE population, yet EZH2+ cells comprised 22%  
248 of all integrated cells (Fig. 3F). This demonstrates that cluster 10 cells will successfully integrate  
249 and establish in a preformed RPE monolayer. None of the integrated RPE cells exhibited  
250 YEATS2 staining (Fig. S3), indicating that the cluster 2 subpopulation, which represents ~9% of  
251 the original isolate, did not successfully establish within the monolayer. These results support  
252 our hypothesis that specific RPE subpopulations contribute to an efficacious transplant.

### 253 **A long non-coding RNA as a biomarker of efficacious transplantation**

254 After probing for a possible connection between transplantation and changes in the RPE  
255 subpopulation composition, we sought to identify a biomarker of efficacious transplantation.  
256 Potential efficacy marker candidates were identified by selecting the genes that had a maximum  
257 expression of at least 100 counts in EFF-RPE and at least a 2-fold increase in expression over  
258 the W2-NE- and NE-RPE groups in our bulk sequencing data. This yielded a total of 36  
259 candidate markers (Table S12). The most consistent and differentially expressed candidate  
260 gene is a lncRNA, TCONS\_00005049, hereafter referred to as **TREX (Transplanted RPE**  
261 **Expressed)**. We examined the level of TREX in the bulk-RNA-seq data of RPESC-RPE samples  
262 that had available *in vivo* efficacy data in the RCS rat quantified by optokinetic tracking (OKT)  
263 measures of visual acuity. There was a striking positive correlation between OKT data indicating  
264 improved vision and increased levels of TREX (Fig. 4A). We next verified TREX levels in these  
265 samples by performing qPCR, and again EFF-RPE demonstrated higher levels of TREX (Fig.  
266 4B) than the non-efficacious groups. These data suggest that a threshold level of TREX  
267 expression was associated with effective transplantation and improved vision.

268 We next undertook qPCR for nine RPE lines including clinical grade cultures obtained  
269 under GMP conditions at different cell culture times (Fig. 4C). Most of the lines follow a similar  
270 trend with a low level at 2 weeks peaking at 4 weeks. Based on the known transplant data  
271 outcomes described previously, we were then able to determine a minimal level of TREX  
272 expression (compared to control 18s levels) that was associated with a successful transplant.  
273 Note that due to the introduction of proprietary changes made to the 18s taqman probe by its

274 manufacturer, we also established a threshold using HPRT as an internal control for future use,  
275 using RPE samples that had demonstrated *in vivo* efficacy (229 at 7 weeks) versus not  
276 efficacious (230 at 8 weeks) (Fig. 4D). We next sought to manipulate the level of TREX. As a  
277 starting point, we determined if TREX, was primarily in the cytoplasm or the nucleus. Using two  
278 different RPE cell lines cultured for 4 weeks, we performed qPCR for TREX on the cytoplasmic  
279 fraction or on isolated nuclei and found a 40%:60% distribution respectively (Fig. 4E). Based on  
280 this distribution, we decided to use a gapmer-based approach to knock down TREX levels.  
281 Gapmer knockdown relies on RNase H to cleave the targets and can be effective in both the  
282 nucleus and cytoplasm (Liang et al., 2017). We designed and tested four gapmers against  
283 TREX and achieved over 50% knockdown with one of the gapmers compared to scrambled and  
284 untransfected controls (Fig. 4F).

285 To assess the functional effect of TREX levels on RPE transplantation we utilized our *in*  
286 *vitro* integration assay. Using the gapmer based approach, we knocked down TREX in RPESC-  
287 RPE cells that had been cultured for 4 weeks and then plated the TREX-knockdown cells on the  
288 established mature RPE monolayers used for the integration assay. The scrambled control cells  
289 had an integration rate of approximately 2% while significantly fewer TREX-knockdown cells  
290 were integrated (~0.2%) (Fig. 4G). We next used a lentiviral overexpression system to  
291 overexpress TREX in RPESC-RPE cells cultured for 4 weeks and then performed the  
292 integration assay. The empty vector control cells had an integration rate of ~3% whereas the  
293 TREX overexpressing cells demonstrated a marked increase in integration with ~18% or 6 times  
294 the number of cells integrating into the mature monolayer (Fig. 4H). These results indicate that  
295 TREX is not only associated with but is also necessary (Fig. 4G) and sufficient (Fig. 4H) to  
296 increase engraftment and transplant efficacy, strongly supporting an important role of TREX to  
297 mediate RPE cell integration into a mature RPE monolayer.

298 Based on our *in vitro* results, we proceeded to assess the role of TREX in RPE  
299 transplant efficacy at vision rescue. As previously observed, RPE line 230 cells cultured for 7  
300 weeks were not efficacious after subretinal transplantation in the RCS rat model of retinal  
301 degeneration (Fig. 1B). We transfected RPE 230 cells with either an empty control vector or a  
302 dox inducible TREX OE virus and cultured them for 7 weeks prior to transplantation. Vision was  
303 measured by OKT at 60 days after transplantation (Table S13). Eight rats were transplanted for  
304 each condition and five sham (vehicle only) subretinal injections were used as control. The OKT  
305 results generally have a bimodal distribution indicative of either a positive effect on vision rescue  
306 or a lack of vision rescue. An animal's vision was considered 'rescued' if the OKT measure was



307 above 0.4 cycles/degree and considered ‘not rescued’ if below this threshold. We took a  
308 Bayesian approach to the analysis and identified a ‘**Region Of Practical Equivalence**’ (ROPE, a  
309 range of values representing no effect) based on the highest density interval (HDI, range of  
310 values that 95% of the distribution lays under) from the OKT results at p90 of the cumulative  
311 sham (vehicle injected) (n=92, Table S13). Using the sham results as a prior probability, we  
312 applied a Bernoulli likelihood function to calculate the posterior distribution of the probability of  
313 an efficacious transplant of our empty vector control (Fig. 4I) and of TREX OE cells (Fig. 4J).  
314 We then sampled from the posterior probabilities to identify the HDI of each condition. In the  
315 case of the empty vector control cells, the HDI completely encompassed the ROPE indicating  
316 that the control RPE cells performed similarly to the sham as previously observed with the  
317 inefficacious 7-week-old RPE 230 cultures. However, in the case of the TREX OE cells, the HDI  
318 laid completely to the right of the ROPE, indicating an increase in efficacy associated with RPE  
319 cells overexpressing TREX. In addition to our Bayesian approach, we also performed binomial  
320 tests for each comparison and found that while the control cells were not significantly different  
321 from sham ( $p=0.09157$ ), the TREX OE cells were different from both sham ( $p=1.92e-06$ ) and the  
322 control cells ( $p=0.004227$ ). Hence, there was a positive effect of creating high TREX levels on  
323 cell transplant efficacy; we essentially converted a non-efficacious RPE cell preparation to one  
324 that effectively rescued vision in this animal model. We next sought to determine if having  
325 endogenous high levels of TREX was sufficient to demonstrate transplant efficacy.

326 RPE line 255 has exceptionally high levels of TREX after only 2 weeks of culture (Fig.  
327 4C), a time point in RPE culture that is usually ineffective at vision rescue compared with 4  
328 weeks of culture prior to transplantation (Davis et al., 2017). We cultured RPE 255 cells for 2  
329 weeks without modification and transplanted them into the RCS rat model at p30, followed by  
330 OKT 60 days later. The results demonstrated that the RPE 255 cells with high endogenous  
331 TREX were indeed efficacious for transplantation (5 out of 5 animals; Fig. 4K). This result  
332 indicates that TREX level was more accurate than time in culture as a biomarker of RPE255  
333 transplantation efficacy. The HDI of the posterior probability of a successful transplant was  
334 outside our ROPE and the binomial test also support a significant change ( $p=1.18e-06$ ). Overall,  
335 these results provide strong evidence that TREX is not only a biomarker of efficacious RPE, but  
336 that TREX also functions to mediate RPE transplantation efficacy.

## 337 **Discussion**



338           The recent expansion in the number and diversity of RPE cell transplant products  
339 developed for treating RPE loss in AMD has increased the need to characterize the identity and  
340 efficacy attributes of RPE cell products. To advance this knowledge, we performed bulk and  
341 single cell sequencing on adult RPESC-derived RPE cell products during *in vitro* differentiation.  
342 These studies characterized the individual RPE subpopulations present and identified  
343 transplantation efficacy gene markers. Our analysis revealed a clear distinction between the  
344 transcriptomes of efficacious and non-efficacious RPE cell products in animal studies that were  
345 consistent across different donors, allowing us to identify molecular pathways associated with  
346 transplant efficacy and identify potential biomarkers for efficacious RPE cultures.

347           Our study identified several cell product attributes related to successful transplants by  
348 exploring the transcriptional changes in RPESC-RPE cultures between cell populations with  
349 varying transplant success in RCS rats. Our earlier work (Davis et al., 2017) showed that time in  
350 culture correlated with vision rescue, indicating that time served as a surrogate measure of RPE  
351 cell differentiation stage and vision rescue efficacy. Our present transcriptomic analysis  
352 demonstrated an incomplete ability to separate the RPE cell transcriptomic profiles based solely  
353 on time, pointing out the need to dissect RPE cellular heterogeneity at each timepoint. Recent  
354 studies using single cell approaches have reported multiple RPE subpopulations within the stem  
355 cell-derived, native human and mouse RPE with unique transcriptional and morphological  
356 characteristics, indicating that the RPE cell layer is composed of heterogenous cell populations  
357 that may have differing functional and clinical capabilities (Lee et al., 2022; Petrus-Reurer et al.,  
358 2022; Voigt et al., 2019; Xu et al., 2021). Identification of the subpopulations responsible for  
359 vision rescue can improve regulatory evaluation and improve RPE cell products to result in  
360 better transplantation outcomes.

361           This transcriptomic analysis identified 13 subpopulations within the RPESC-RPE  
362 cultures with distinct patterns of gene expression, consistent with recent findings from other  
363 laboratories (Petrus-Reurer et al., 2022; Xu et al., 2021). Three clusters, 10, 6 and 2,  
364 demonstrated enrichment for pathways associated with cell differentiation and proliferation  
365 implying that these subpopulations had progenitor characteristics and were candidates to  
366 improve both cell manufacture and transplant success. To enhance our ability to identify  
367 subpopulations with more effective transplantation outcomes and uncover potential biomarkers,  
368 we developed an *in vitro* integration assay to mimic engraftment after *in vivo* transplantation  
369 when transplanted cells insert into the host RPE monolayer. This assay provides a more cost  
370 effective and higher throughput method than animal models to examine how an RPE cell

371 population performs in the early engraftment step of a successful transplantation. Additionally, it  
372 allows insight into how the genetic manipulation of RPE populations may affect the transplant  
373 competency of specific cellular subpopulations. Using the *in vitro* integration assay, we found  
374 that a subset of RPE cells were better able to integrate into a mature RPE monolayer. The  
375 integrating RPE cells were more likely to express EZH2+, a marker of cluster 10. EZH2 is a  
376 polycomb transcription factor involved in histone methylation and stem cell self-renewal and  
377 differentiation (Cao et al., 2002; Kamminga et al., 2006; Karantanos et al., 2016). Notably,  
378 cluster 10 showed the highest level of cell cycle markers, underscoring its stem- or progenitor-  
379 like state. Further study of the prospectively enriched cluster 10 subtype will be worthwhile to  
380 understand the roles of this important subpopulation in RPE layer cell biology, RPE cell product  
381 manufacture, and RPE transplantation safety and efficacy outcomes. It is possible that  
382 interactions between different clusters within the product are beneficial, and we anticipate future  
383 studies to alter RPE subtype composition will be needed to determine the optimal product  
384 composition.

385 Our analysis identified potential biomarkers of transplant efficacy, including our top  
386 candidate, the lncRNA TREX. Recently, lncRNAs have emerged as potential markers for  
387 predicting the quality of other types of tissues and cell products used for transplantation (Wong  
388 et al., 2019; Zou et al., 2019). Manipulating TREX expression in our *in vitro* RPE integration  
389 assay suggests that TREX may regulate cellular processes involved in engraftment into the host  
390 RPE. However, TREX could be utilizing a wide variety of processes ranging from upregulating  
391 cell migration to sustaining cell survival to increase RPE potency and further research is needed  
392 to understand the mechanism. *In vivo* transplantation experiments support a role for TREX in  
393 successful transplantation. An RPE cell line that expressed unusually high levels of TREX was  
394 effective at the 2-week stage of differentiation that is usually ineffective. Furthermore,  
395 knockdown of TREX caused efficacious REP lines to no longer support cell integration *in vitro*.  
396 Finally, over-expression of TREX in non-efficacious RPE lines improved the probability of vision  
397 rescue. These results provide strong evidence that TREX is directly involved in mediating  
398 transplant efficacy and that TREX can predict the efficacy of RPE cell therapy products. Thus,  
399 TREX is a critical attribute and candidate potency biomarker for the RPESC-RPE cell product.  
400 While the emphasis of RPE cell product development has been placed on overall RPE purity  
401 assessed by canonical RPE markers, it is likely that subpopulation heterogeneity found in adult  
402 RPESC-RPE cells is reflected in other RPE cell products such as those derived from pluripotent  
403 stem cells (35705015). Our work provides a path to establish a level of TREX expression to

404 identify RPESC-RPE cell products, which may apply to other types of RPE cell products, with  
405 the highest likelihood of successful transplantation.

406 In conclusion, our findings highlight the importance of characterizing at the single cell  
407 level stem-cell derived RPE cell products designed for cell transplantation. Knowledge about the  
408 identity and quality attributes of RPE cell products is needed to guide their successful  
409 development. Our findings highlight the importance knowing the subpopulations present within  
410 an overall bulk RPE population. Further in-depth characterization of the different subpopulations  
411 of RPE cells present in cell replacement products will be valuable to improve manufacture,  
412 regulatory evaluation and transplant efficacy of RPE cell products to benefit retinal patients with  
413 degenerative diseases such as dry AMD.

## 414 **Methods**

### 415 *RPE cell culture and subject details*

416 All RPE cell lines were generated from donor eyes obtained from certified eye banks  
417 with consent for research use. The donor details are listed in Table S14. RPE cells were  
418 cultured in a 24-well plate at 100K cells per well. Different RPE lines were used for different  
419 experiments in this study due to the limited availability of adult RPESC-derived RPE cells. RPE  
420 cells used in scRNA-Seq experiments were cultured on Transwell inserts (Corning, Corning,  
421 NY). Cultures were maintained in RPE medium: DMEM F12 50/50 medium (Corning), MEM  
422 alpha modification medium (Sigma-Aldrich), 1.25 mL Glutamax (Gibco), 2.5 mL Sodium  
423 Pyruvate (Gibco), 2.5 mL Niacinamide (1M; Spectrum Chemical Inc., CA), 2.5 mL MEM NEAA  
424 (Gibco), 2% or 10% heat inactivated fetal bovine serum, supplemented with THT (Taurine,  
425 Hydrocortisone, Triiodo-thyronin), and 1.25 mL N1 medium supplement (Sigma-Aldrich). Cells  
426 were incubated in a humidified incubator at 37 °C and 5% CO<sub>2</sub> and the medium was replaced  
427 every 3 days.

### 428 *Bulk and single cell RNA sequencing preparation*

429 Bulk and single cell RNA sequencing were performed on cultured RPE cells collected at  
430 2-, 4-, and 8-weeks post plating. Single cell suspensions were prepared using 0.25% Trypsin  
431 (Thermo Fisher Scientific, Waltham, MA) and processed for either bulk or scRNA sequencing.  
432 For bulk sequencing RNA was isolated with Direct-zol RNA kit (Zymo Research, Irvine, CA).  
433 Library preparation was then carried out with the TruSeq Stranded Total RNA kit (Illumina, San

434 Diego, CA) ribo-depleted by the University of Rochester Genomics Research Center and  
435 sequenced using a NextSeq550 high-output flow cell generating 2 × 151-bp read lengths.

436 For scRNA-seq, the RPE single cell suspension was stained with 1 µl SYTO64 dye  
437 (Invitrogen, Carlsbad, CA) in 1mL PBS for 20 minutes at room temperature, then washed twice  
438 in fresh PBS. Next, cells were diluted to 25,000 cells/mL and dispensed into ICELL8 3' DE chips  
439 (Takara Bio, CA) using an MSND device (Takara Bio). Cell dispensing, and in-chip reverse  
440 transcription PCR were performed using a 3' DE Chip and Reagent kit (Takara Bio) according to  
441 the manufacturer's instructions. Following the extraction of PCR products, cDNA samples were  
442 concentrated and purified using a DNA Clean & Concentrator-5 kit (Zymo Research) and  
443 purified using a 0.6X proportion of AMPure XP magnetic beads (Beckman Coulter, Brea, CA)  
444 according to manufacturer protocols. Library preparation was performed using a Nextera XT  
445 DNA Library Preparation Kit (Illumina) according to the Takara's 3' DE chip and reagent kit  
446 instructions. The quantification, and quality checks of the cDNA products were carried out at the  
447 University at Albany's NextGen Sequencing core facility. The concentration of cDNA products  
448 was quantified using a Qubit Fluorometer and the Qubit dsDNA HS Assay Kit (Thermo Fisher  
449 Scientific). The quality of the cDNA product was checked using an Agilent High Sensitivity DNA  
450 Kit and Agilent 2100 Bioanalyzer (Agilent Technologies, Palo Alto, CA) to ensure the complete  
451 removal of contaminants. Libraries were sequenced using a NovaSeq 6000 high-output flow cell  
452 generating 2 × 150-bp read lengths (GeneWiz).

#### 453 *Data processing and analysis*

454 For bulk sequencing, the University at Rochester core facility processed the raw Illumina  
455 BCL files and provided fastq files. Files were then mapped to hg19 and converted to bam files  
456 using STAR (v2.4). Bam files were then read into R using the GenomicAlignments package  
457 (code available at [https://github.com/neural-stem-cell-institute/RPESC\\_TREX](https://github.com/neural-stem-cell-institute/RPESC_TREX)) to generate a  
458 counts matrix for further analysis. For single cell sequencing, raw Illumina read BCL Files were  
459 converted to fastq files using the bcl2fastq2 software (bcl2Fastq v2.19.1, Illumina, Inc). For  
460 scRNA-seq the, fastq files were then merged into read1 (ICELL8 barcode sequence) and read2  
461 (transcript sequence) fastq files. Using the metadata file from the ICELL8 system containing  
462 single cell well information their specific nanowell barcodes, read1 and read2 files were  
463 demultiplexed based on nanowell barcodes. The sequence reads were then converted to bam  
464 files and mapped to hg19 using STAR (v2.5). The code utilized for processing the ICELL8 data

465 can be found at github (<https://github.com/neural-stem-cell-institute/sc-pipeline>). The final  
466 transcript read counts RData file was used as the input reads matrix for further analysis in R.

467 All code as well as package versions for the analysis can be found at  
468 [https://github.com/neural-stem-cell-institute/RPESC\\_TREX](https://github.com/neural-stem-cell-institute/RPESC_TREX). Briefly, bulk data was analyzed with  
469 the EdgeR and DESeq2 packages to identify differentially expressed genes. Single cell data  
470 was analyzed with the Seurat package (V3.1). Strict criteria were used for the QC of the single  
471 cell dataset, including a minimum feature cutoff of 200 and a minimum cell cutoff of 3. Different  
472 clusters were identified according to Seurat's clustering workflow. scRNA-seq enrichment  
473 analysis was performed with the screp package ([https://github.com/neural-stem-cell-](https://github.com/neural-stem-cell-institute/screp/)  
474 [institute/screp/](https://github.com/neural-stem-cell-institute/screp/))

#### 475 *Lentiviral Vectors Production and Infection*

476 The exonic TREX sequence (TCONS\_00005049) was downloaded from the UCSC  
477 genome browser (hg19) and a TREX insert with 15bp overhangs was synthesized with GeneArt  
478 Gene Synthesis (Thermo Fisher Scientific). The insert was then cloned into a EcoRI cut TetO-  
479 FUW vector (Addgene) using an In-Fusion HD Cloning kit (Takara Bio) and sequenced  
480 (GeneWiz) to verify plasmid. Lentivirus was generated in 75% confluent 293FT cells by co-  
481 transfecting the packaging plasmids pCMV-pLNV and pCMV-pVSVG, as well as either the  
482 TetO-FUW-TREX or TetO-FUW plasmids into the cells with the XtremeGene HP DNA  
483 transfection reagent at a ratio of 1:2.5 according to manufacturer's protocol. Supernatant was  
484 collected 24 and 72 hours after transfection followed by centrifugation at 21,700g for 2.5 hours  
485 to concentrate the viral particles. Viral particles were tittered via qPCR (ABM qPCR Lentivirus  
486 Titration Kit) before storage at -80°C.

#### 487 *Animal maintenance, transplantation, and analysis*

488 Royal College of Surgeons (RCS) rats were obtained from Dr. Shaomei Wang and Long  
489 Evans rats from Taconic Biosciences, Inc. were maintained under a 12-hour light/dark cycle  
490 according to IACUC-approved procedures. Transplantations were carried out as previously  
491 described (Zhao et al., 2017). Briefly, RCS rats at P28–P32 days were treated with cyclosporine  
492 (210 mg/L), then a 33-gauge needle was used to inject 1.5 µL of RPESC-RPE cell suspension  
493 or BSS vehicle control under the retina under isoflurane anesthesia. Surgical success was  
494 confirmed by visualization of a subretinal bleb using optical coherence tomography.

495 The spatial frequency threshold for opto-kinetic tracking (OKT) was measured (Table  
496 S1s) by observers masked to treatment group using a device (CerebralMechanics) and  
497 methods previously described (Douglas et al., 2005; Prusky et al., 2004) (Table S13). The  
498 results were characterized by a non-normal bimodal distribution leading us to assign transplants  
499 as either efficacious or not efficacious. In addition to binomial testing, a Bayesian approach was  
500 utilized to compare groups using R. The code for the analysis is available at  
501 [https://github.com/neural-stem-cell-institute/RPESC\\_TREX](https://github.com/neural-stem-cell-institute/RPESC_TREX). Briefly, a region of practical  
502 equivalence (ROPE) was established using the results from 92 sham experiments. Each group  
503 was then compared to this ROPE to determine if a treatment demonstrated an unambiguous  
504 difference to the sham experiments.

#### 505 *In vitro Integration assay*

506 A 'receiver' monolayer of RPE (RPE line 270) was grown on Transwells inserts (6.5 mm  
507 diameter) for 8 weeks. 'Donor' RPE cells at P2 (transfected with a GFP lentiviral maker) were  
508 grown for 4 weeks, made into a single cell suspension, and 12,000 RPE cells were transplanted  
509 on to the 'receiver' RPE monolayer. After one week, Transwells were washed, fixed with 4%  
510 paraformaldehyde, and imaged using an LSM780 Zeiss confocal microscope (Zeiss, Germany).  
511 Twenty images, whose locations were distributed across the Transwell and in the same relative  
512 position to each other, were taken for each Transwell. The images covered ~4% of the wells  
513 surface. Confocal images were analyzed using the Zeiss ZEN software (V3.1). Integrated cells  
514 were identified by determining if a nucleus from a 'donor' cell was in the same z-plane as  
515 'receiver' nuclei using the 2.5D view. The percent of integrated cells for each sample was  
516 calculated using the following equation:

$$517 \quad \frac{\text{Number of Integrated cells}}{(\text{plated donor cells} \times \text{covered well surface})} \times 100 = \% \text{ Integrated RPE}$$

#### 518 *Immunofluorescence staining*

519 Fixed Transwell membranes were immunostained for EZH2 and YEATS2 to determine  
520 the identity of integrated cells. Cells were permeabilized using 1% Triton X-100 in DPBS for one  
521 hour at room temperature. After removing Triton X-100 and rinsing 2 times with DPBS, cells  
522 were incubated with EZH2 and YEATS2 primary antibodies (Thermo Fisher Scientific) according  
523 to the manufacturer's instructions. Next, primary antibodies were removed and cells were  
524 washed with DPBS twice and incubated with secondary donkey anti rabbit or goat anti mouse



525 antibody conjugated with Alexaflour 647 or Alexaflour 555 dyes and DAPI (1:1000) diluted in  
526 DPBS with 0.5% bovine serum albumin (BSA) for 1 hours at room temperature. Immunostained  
527 cells were then washed 2 times with DPBS for 5 minutes at room temperature and mounted on  
528 glass slides using Fluoromount G (Thermo Fisher Scientific) and a coverslip. Samples were  
529 imaged using an LSM780 Zeiss confocal microscope (Zeiss, Germany).

### 530 *Quantitative RT-PCR*

531 RNA was isolated with the Direct-zol RNA kit (Zymo Research) and cDNA was  
532 generated using the Superscript VILO kit (Thermo Fisher Scientific) according to manufacturer's  
533 instructions. Quantitative RT-PCR was performed using TaqMan gene expression assays and  
534 TaqMan Universal Master Mix (Thermo Fisher Scientific). Either 18s-VIC or HPRT-VIC was  
535 used as an internal control for all reactions.

536

### 537 **References**

- 538 Augsten, M., Hägglöf, C., Olsson, E., Stolz, C., Tsagozis, P., Levchenko, T., Frederick, M.J.,  
539 Borg, A., Micke, P., Egevad, L., *et al.* (2009). CXCL14 is an autocrine growth factor for  
540 fibroblasts and acts as a multi-modal stimulator of prostate tumor growth. *Proceedings of the*  
541 *National Academy of Sciences of the United States of America* *106*, 3414-3419.
- 542 Bennis, A., Gorgels, T.G.M.F., Ten Brink, J.B., van der Spek, P.J., Bossers, K., Heine, V.M.,  
543 and Bergen, A.A. (2015). Comparison of Mouse and Human Retinal Pigment Epithelium Gene  
544 Expression Profiles: Potential Implications for Age-Related Macular Degeneration. *PLoS One* *10*,  
545 e0141597.
- 546 Cao, R., Wang, L., Wang, H., Xia, L., Erdjument-Bromage, H., Tempst, P., Jones, R.S., and  
547 Zhang, Y. (2002). Role of histone H3 lysine 27 methylation in Polycomb-group silencing.  
548 *Science* *298*, 1039-1043.
- 549 Cavallaro, T., Martone, R.L., Dwork, A.J., Schon, E.A., and Herbert, J. (1990). The retinal  
550 pigment epithelium is the unique site of transthyretin synthesis in the rat eye. *Investigative*  
551 *Ophthalmology & Visual Science* *31*, 497-501.
- 552 Cuomo, A.S.E., Seaton, D.D., McCarthy, D.J., Martinez, I., Bonder, M.J., Garcia-Bernardo, J.,  
553 Amatya, S., Madrigal, P., Isaacson, A., Buettner, F., *et al.* (2020). Single-cell RNA-sequencing  
554 of differentiating iPS cells reveals dynamic genetic effects on gene expression. *Nature*  
555 *communications* *11*, 810.
- 556 da Cruz, L., Fynes, K., Georgiadis, O., Kerby, J., Luo, Y.H., Ahmado, A., Vernon, A., Daniels,  
557 J.T., Nommiste, B., Hasan, S.M., *et al.* (2018). Phase 1 clinical study of an embryonic stem cell-  
558 derived retinal pigment epithelium patch in age-related macular degeneration. *Nature*  
559 *Biotechnology* *36*, 328-337.



- 560 Davis, R.J., Alam, N.M., Zhao, C., Muller, C., Saini, J.S., Blenkinsop, T.A., Mazzoni, F.,  
561 Campbell, M., Borden, S.M., Charniga, C.J., *et al.* (2017). The Developmental Stage of Adult  
562 Human Stem Cell-Derived Retinal Pigment Epithelium Cells Influences Transplant Efficacy for  
563 Vision Rescue. *Stem Cell Reports* 9, 42-49.
- 564 Dobin, A., Davis, C.A., Schlesinger, F., Drenkow, J., Zaleski, C., Jha, S., Batut, P., Chaisson,  
565 M., and Gingeras, T.R. (2013). STAR: ultrafast universal RNA-seq aligner. *Bioinformatics*  
566 (Oxford, England) 29, 15-21.
- 567 Douglas, R.M., Alam, N.M., Silver, B.D., McGill, T.J., Tschetter, W.W., and Prusky, G.T. (2005).  
568 Independent visual threshold measurements in the two eyes of freely moving rats and mice  
569 using a virtual-reality optokinetic system. *Vis Neurosci* 22, 677-684.
- 570 Gu, X., Neric, N.J., Crabb, J.S., Crabb, J.W., Bhattacharya, S.K., Rayborn, M.E., Hollyfield,  
571 J.G., and Bonilha, V.L. (2012). Age-related changes in the retinal pigment epithelium (RPE).  
572 *PloS One* 7, e38673.
- 573 Hafemeister, C., and Satija, R. (2019). Normalization and variance stabilization of single-cell  
574 RNA-seq data using regularized negative binomial regression. *Genome Biology* 20, 296.
- 575 Kamminga, L.M., Bystrykh, L.V., de Boer, A., Houwer, S., Douma, J., Weersing, E., Dontje, B.,  
576 and de Haan, G. (2006). The Polycomb group gene *Ezh2* prevents hematopoietic stem cell  
577 exhaustion. *Blood* 107, 2170-2179.
- 578 Karantanos, T., Chistofides, A., Barhdan, K., Li, L., and Boussiotis, V.A. (2016). Regulation of T  
579 Cell Differentiation and Function by EZH2. *Front Immunol* 7, 172.
- 580 Kopitz, J., Holz, F.G., Kaemmerer, E., and Schutt, F. (2004). Lipids and lipid peroxidation  
581 products in the pathogenesis of age-related macular degeneration. *Biochimie* 86, 825-831.
- 582 Lee, H., Lee, H.Y., Chae, J.B., Park, C.W., Kim, C., Ryu, J.H., Jang, J., Kim, N., and Chung, H.  
583 (2022). Single-cell transcriptome of the mouse retinal pigment epithelium in response to a low-  
584 dose of doxorubicin. *Commun Biol* 5, 722.
- 585 Lee, J.H., Gao, C., Peng, G., Greer, C., Ren, S., Wang, Y., and Xiao, X. (2011). Analysis of  
586 transcriptome complexity through RNA sequencing in normal and failing murine hearts. *Circ Res*  
587 109, 1332-1341.
- 588 Liang, X.H., Sun, H., Nichols, J.G., and Crooke, S.T. (2017). RNase H1-Dependent Antisense  
589 Oligonucleotides Are Robustly Active in Directing RNA Cleavage in Both the Cytoplasm and the  
590 Nucleus. *Mol Ther* 25, 2075-2092.
- 591 Lin, H., Xu, H., Liang, F.-Q., Liang, H., Gupta, P., Havey, A.N., Boulton, M.E., and Godley, B.F.  
592 (2011). Mitochondrial DNA damage and repair in RPE associated with aging and age-related  
593 macular degeneration. *Investigative Ophthalmology & Visual Science* 52, 3521-3529.
- 594 Lu, J., Chatterjee, M., Schmid, H., Beck, S., and Gawaz, M. (2016). CXCL14 as an emerging  
595 immune and inflammatory modulator. *Journal of Inflammation (London, England)* 13, 1.
- 596 Mandai, M., Watanabe, A., Kurimoto, Y., Hiram, Y., Morinaga, C., Daimon, T., Fujihara, M.,  
597 Akimaru, H., Sakai, N., Shibata, Y., *et al.* (2017). Autologous Induced Stem-Cell-Derived Retinal  
598 Cells for Macular Degeneration. *The New England Journal of Medicine* 376, 1038-1046.

- 599 Mullins, R.F., Kuehn, M.H., Faidley, E.A., Syed, N.A., and Stone, E.M. (2007). Differential  
600 macular and peripheral expression of bestrophin in human eyes and its implication for best  
601 disease. *Investigative Ophthalmology & Visual Science* *48*, 3372-3380.
- 602 Ortolan, D., Sharma, R., Volkov, A., Maminishkis, A., Hotaling, N.A., Huryn, L.A., Cukras, C., Di  
603 Marco, S., Bisti, S., and Bharti, K. (2022). Single-cell-resolution map of human retinal pigment  
604 epithelium helps discover subpopulations with differential disease sensitivity. *Proc Natl Acad Sci*  
605 *U S A* *119*, e2117553119.
- 606 Petrus-Reurer, S., Lederer, A.R., Baque-Vidal, L., Douagi, I., Pannagel, B., Khven, I., Aronsson,  
607 M., Bartuma, H., Wagner, M., Wrona, A., *et al.* (2022). Molecular profiling of stem cell-derived  
608 retinal pigment epithelial cell differentiation established for clinical translation. *Stem Cell Reports*  
609 *17*, 1458-1475.
- 610 Pfeffer, B.A., Becerra, S.P., Borst, D.E., and Wong, P. (2004). Expression of transthyretin and  
611 retinol binding protein mRNAs and secretion of transthyretin by cultured monkey retinal pigment  
612 epithelium. *Molecular Vision* *10*, 23-30.
- 613 Prusky, G.T., Alam, N.M., Beekman, S., and Douglas, R.M. (2004). Rapid quantification of adult  
614 and developing mouse spatial vision using a virtual optomotor system. *Invest Ophthalmol Vis*  
615 *Sci* *45*, 4611-4616.
- 616 Salero, E., Blenkinsop, T.A., Corneo, B., Harris, A., Rabin, D., Stern, J.H., and Temple, S.  
617 (2012). Adult human RPE can be activated into a multipotent stem cell that produces  
618 mesenchymal derivatives. *Cell Stem Cell* *10*, 88-95.
- 619 Sayols, S. (2020). rrvgo: a Bioconductor package to reduce and visualize Gene Ontology  
620 terms.
- 621 Sharma, R., Khristov, V., Rising, A., Jha, B.S., Dejene, R., Hotaling, N., Li, Y., Stoddard, J.,  
622 Stankewicz, C., Wan, Q., *et al.* (2019). Clinical-grade stem cell-derived retinal pigment  
623 epithelium patch rescues retinal degeneration in rodents and pigs. *Science Translational*  
624 *Medicine* *11*.
- 625 Sparrow, J.R., Hicks, D., and Hamel, C.P. (2010). The retinal pigment epithelium in health and  
626 disease. *Current Molecular Medicine* *10*, 802-823.
- 627 Strauss, O. (2005). The retinal pigment epithelium in visual function. *Physiological Reviews* *85*,  
628 845-881.
- 629 Strunnikova, N.V., Maminishkis, A., Barb, J.J., Wang, F., Zhi, C., Sergeev, Y., Chen, W.,  
630 Edwards, A.O., Stambolian, D., Abecasis, G., *et al.* (2010). Transcriptome analysis and  
631 molecular signature of human retinal pigment epithelium. *Human molecular genetics* *19*, 2468-  
632 2486.
- 633 Vives-Bauza, C., Anand, M., Shiraz, A.K., Shirazi, A.K., Magrane, J., Gao, J., Vollmer-Snarr,  
634 H.R., Manfredi, G., and Finnemann, S.C. (2008). The age lipid A2E and mitochondrial  
635 dysfunction synergistically impair phagocytosis by retinal pigment epithelial cells. *The Journal of*  
636 *biological chemistry* *283*, 24770-24780.

- 637 Voigt, A.P., Mulfaul, K., Mullin, N.K., Flamme-Wiese, M.J., Giacalone, J.C., Stone, E.M., Tucker,  
638 B.A., Scheetz, T.E., and Mullins, R.F. (2019). Single-cell transcriptomics of the human retinal  
639 pigment epithelium and choroid in health and macular degeneration. *Proc Natl Acad Sci U S A*  
640 *116*, 24100-24107.
- 641 Whitmore, S.S., Wagner, A.H., DeLuca, A.P., Drack, A.V., Stone, E.M., Tucker, B.A., Zeng, S.,  
642 Braun, T.A., Mullins, R.F., and Scheetz, T.E. (2014). Transcriptomic analysis across nasal,  
643 temporal, and macular regions of human neural retina and RPE/choroid by RNA-Seq.  
644 *Experimental Eye Research* *129*, 93-106.
- 645 Wong, W.K., Jiang, G., Sorensen, A.E., Chew, Y.V., Lee-Maynard, C., Liuwantara, D., Williams,  
646 L., O'Connell, P.J., Dalgaard, L.T., Ma, R.C., *et al.* (2019). The long noncoding RNA MALAT1  
647 predicts human pancreatic islet isolation quality. *JCI Insight* *5*.
- 648 Xu, Z., Liao, X., Li, N., Zhou, H., Li, H., Zhang, Q., Hu, K., Yang, P., and Hou, S. (2021). A  
649 Single-Cell Transcriptome Atlas of the Human Retinal Pigment Epithelium. *Front Cell Dev Biol*  
650 *9*, 802457.
- 651 Young, M.D., Wakefield, M.J., Smyth, G.K., and Oshlack, A. (2010). Gene ontology analysis for  
652 RNA-seq: accounting for selection bias. *Genome Biol* *11*, R14.
- 653 Zhang, Y., Parmigiani, G., and Johnson, W.E. (2020). *ComBat-Seq*: batch effect  
654 adjustment for RNA-Seq count data. *bioRxiv*.
- 655 Zhao, C., Boles, N.C., Miller, J.D., Kawola, S., Temple, S., Davis, R.J., and Stern, J.H. (2017).  
656 Development of a Refined Protocol for Trans-scleral Subretinal Transplantation of Human  
657 Retinal Pigment Epithelial Cells into Rat Eyes. *J Vis Exp*.
- 658 Zou, Y., Zhang, W., Zhou, H.H., and Liu, R. (2019). Analysis of long noncoding RNAs for acute  
659 rejection and graft outcome in kidney transplant biopsies. *Biomark Med* *13*, 185-195.

660

## 661 **Acknowledgements**

662 This study was funded by the National Eye Institute, National Institutes of Health  
663 (R01EY029281 to J.H.S.). We thank Malcolm Moos, Ph.D. for useful discussions about single  
664 cell strategies to characterize RPE cells. We are grateful for the donors and the Tampa Lions  
665 Eye Institute for Transplant & Research, Tampa, Florida, the Eye Bank for Sight Restoration in  
666 NY, NY, and National Disease Research Interchange for providing the tissues that were  
667 essential for this research.

## 668 **Author Contributions**

669 Conceptualization, S.T., J.S. and N.C.B.; Methodology, F.F., J.M., S.T., J.S. and N.C.B.;  
670 Software, F.F. and N.C.B. Validation, F.F., J.M. and N.C.B. Formal Analysis, F.F.,  
671 Y.W., A.L.W., S.B. and N.C.B.; Transplantation and Analysis, J.M., C.Z, N.A., G.P., N.C.B.;

672 Investigation, F.F., J.M., Y.W., A.L.W., C.Z., S.B. and N.C.B.; Resources, S.T., J.S. and N.C.B.;  
673 Writing – Original Draft, F.F. and N.C.B.; Writing – Review & Editing, F.F., S.T., J.S. and N.C.B.;  
674 Visualization, F.F., Y.W., A.L.W. and N.C.B.; Supervision, S.T., J.S. and N.C.B.; Project  
675 Administration, J.S. and N.C.B.; Funding Acquisition, J.S. and N.C.B.

## 676 **Competing Interests**

677 Glen Prusky is a Principal of Cerebral Mechanics. All other authors declare no competing  
678 interests.

## 679 **Materials and Correspondence**

680 Further information and requests for resources and reagents should be directed to and will be  
681 fulfilled by the Lead Contact, Nathan Boles ([nathanboles@neuralsci.org](mailto:nathanboles@neuralsci.org)).

## 682 **Data Availability**

683 The raw scRNA-Seq data generated during this study are available at GEO; GSE211189  
684 (<https://www.ncbi.nlm.nih.gov/geo/query/acc.cgi?acc=GSE211189>).

## 685 **Code Availability**

686 Code written for this study is available at github ([https://github.com/neural-stem-cell-](https://github.com/neural-stem-cell-institute/RPESC_TREX)  
687 [institute/RPESC\\_TREX](https://github.com/neural-stem-cell-institute/RPESC_TREX)).

## 688 **Figure Legends**

### 689 **Figure 1. RPESC efficacious for transplant have a distinctive transcriptional profile.**

690 (A) Outline of experimental plan for RNA-sequencing. (B) Dot plot illustrating the timepoints  
691 RNA was collected, the cell lines used, and the known and predicted transplant status. SVD  
692 analysis of the 4000 most variable genes by time (C) and by transplant status (D) was carried  
693 out. A discernable pattern was not seen in the time analyzed data, however the data analyzed  
694 by transplant status showed a clear separation between groups. (E-G) Distribution of  
695 significantly different features by RNA type (E), transplant group for coding gene (F) and long  
696 noncoding genes (G). GO enrichment analysis followed by a semantic similarity analysis (Table  
697 S3) visualized by treemap (H). Selected pathways from a REACTOME pathway enrichment  
698 analysis (Table S4).

699 **Figure 2. Single cell RNA- sequencing reveals heterogeneity in RPESC cultures.**

700 Single cell RNA-seq (scRNA-seq) was carried out using the well based ICELL8 system with  
701 Passage 2 cells collected at 2, 4, and 8 weeks. Data was analyzed using the Seurat package.  
702 Dimensionality reduction followed by clustering was used to identify differing clusters of RPESC  
703 reveal considerable heterogeneity (A). The clusters appeared to be well mixed when looking at  
704 time of collection (B). All clusters had cells from each time period with some clusters showing  
705 more variation in their composition (C). Dot plot demonstrating the top five gene markers for  
706 each cluster as identified by a Wilcoxon Rank Sum test (D). Using the marker genes for each  
707 cluster GO enrichment followed by a semantic similarity analysis (E) and REACTOME pathway  
708 analysis (F) was carried out. The numbers above the dots in figure 2F show the number of  
709 pathways in each Reactome tree.

710 **Figure 3. Intersection of Bulk and scRNA-seq data provides insight into potential**  
711 **subpopulations responsible for transplant efficacy.**

712 (A) Upset plot showing the overlap between significantly changing genes (DEGs) in the bulk  
713 RNA-seq data (Bulk-eff) and the marker genes in the scRNA-seq data based on cluster  
714 (Cluster-SC) or time (Time-SC). (B) Membership by time of Bulk-Eff genes and single cell  
715 marker genes classified by time in the single cell data. (C) The cluster membership of single cell  
716 cluster marker genes found in the Bulk-Eff data by counts and percentage of all marker genes in  
717 cluster. We next performed enrichment analysis of the genes shared between the Bulk-Eff and  
718 clusters 2,6, and 10. (D) GO enrichment followed by semantic similarity analysis and (E)  
719 REACTOME pathway enrichment analysis. (F) RPE cells were immunostained for EZH2 after  
720 transplantation of RPE cells cultured for 4 weeks on a RPE monolayer cultured for 8 weeks in  
721 an *in vitro* integration assay. EZH2 expression in the monolayer and integrated cells was  
722 examined by confocal microscopy. A fraction of integrated cells with GFP expression exhibited  
723 EZH2 expression (white arrowheads) indicating that they were members of cluster 10. EZH2 is  
724 expressed in the integrating GFP cells (top) and in a small subpopulation of RPE cells in the 8-  
725 week-old monolayer (bottom). The boxes below each panel show a section across the z-stack  
726 image along the horizontal line indicated by the black arrowhead.

727 **Figure 4. TREX as a biomarker of transplant efficacy.**

728 Potential candidates of efficacy were determined by taking the genes that were expressed at  
729 least 2-fold higher in the efficacious RPESC cells over the W2-NE and NE RPESC with at least  
730 a hundred counts after normalization in the bulk data. (A) A plot of the TREX expression data vs  
731 the known OKT results from transplants. (B) Expression of TREX across transplantation groups.

732 (C) TREX expression across multiple lines over time using qPCR with 18s as an internal control.  
733 The threshold of TREX expression for a successful transplant is calculated based on the  
734 midpoint point the TREX expression of the lowest expressing efficacious cells and highest  
735 expressing non-efficacious cells. (D) TREX expression using qPCR with HPRT as the internal  
736 control. (E) The cytoplasmic or nuclear fractions of RPE cells were isolated and qPCR was used  
737 to look at the distribution of TREX within the cell. (F) Four gapmers against TREX were tested  
738 for efficacy in suppressing TREX levels. G2 was used for all knockdown experiments. Results of  
739 integration assay (G) for TREX knockdown by gapmer or (H) TREX overexpression (n=3).  
740 RPESC transplants were made into the RCS rats and OKT measurements were taken after 90  
741 days. A 'Region of Practical Equivalence', or ROPE, was calculated based on the highest  
742 density interval (HDI) of 92 sham transplants. The HDI of (I) Empty vector control RPESC, (J)  
743 TREX overexpressing RPESC, and (K) RPESC from line 255 having unusually high TREX  
744 expression after just 2 weeks were calculated and the densities for each comparison to sham  
745 were plotted. The HDI of both the TREX-OE cells and the RPE\_255 cells did not overlap with  
746 the ROPE demonstrating higher efficacy in transplantation, whereas the empty vector control  
747 cells encompassed the ROPE demonstrating no clear difference.

748 **Figure S1. Expression of RPE related genes.**

749 (A) Intersection of RPE signature genes with genes expressed in each cluster. (B) Select gene  
750 expression using simplified violin plots. (C) Expression of RPE65 in 8-week-old RPE cultures.

751 **Figure S2. Outline of Integration Assay.**

752 Description of novel integration assay's experimental design and analysis method.

753 **Figure S3. Expression of YEATS2 in RPE cells.**

754 YEATS2 was expressed in a subpopulation of 8-week-old RPE cells cultured on Transwells (top  
755 row, white arrowheads), but no YEATS2 expression was found in integrated RPE cells labeled  
756 with GFP (bottom row).



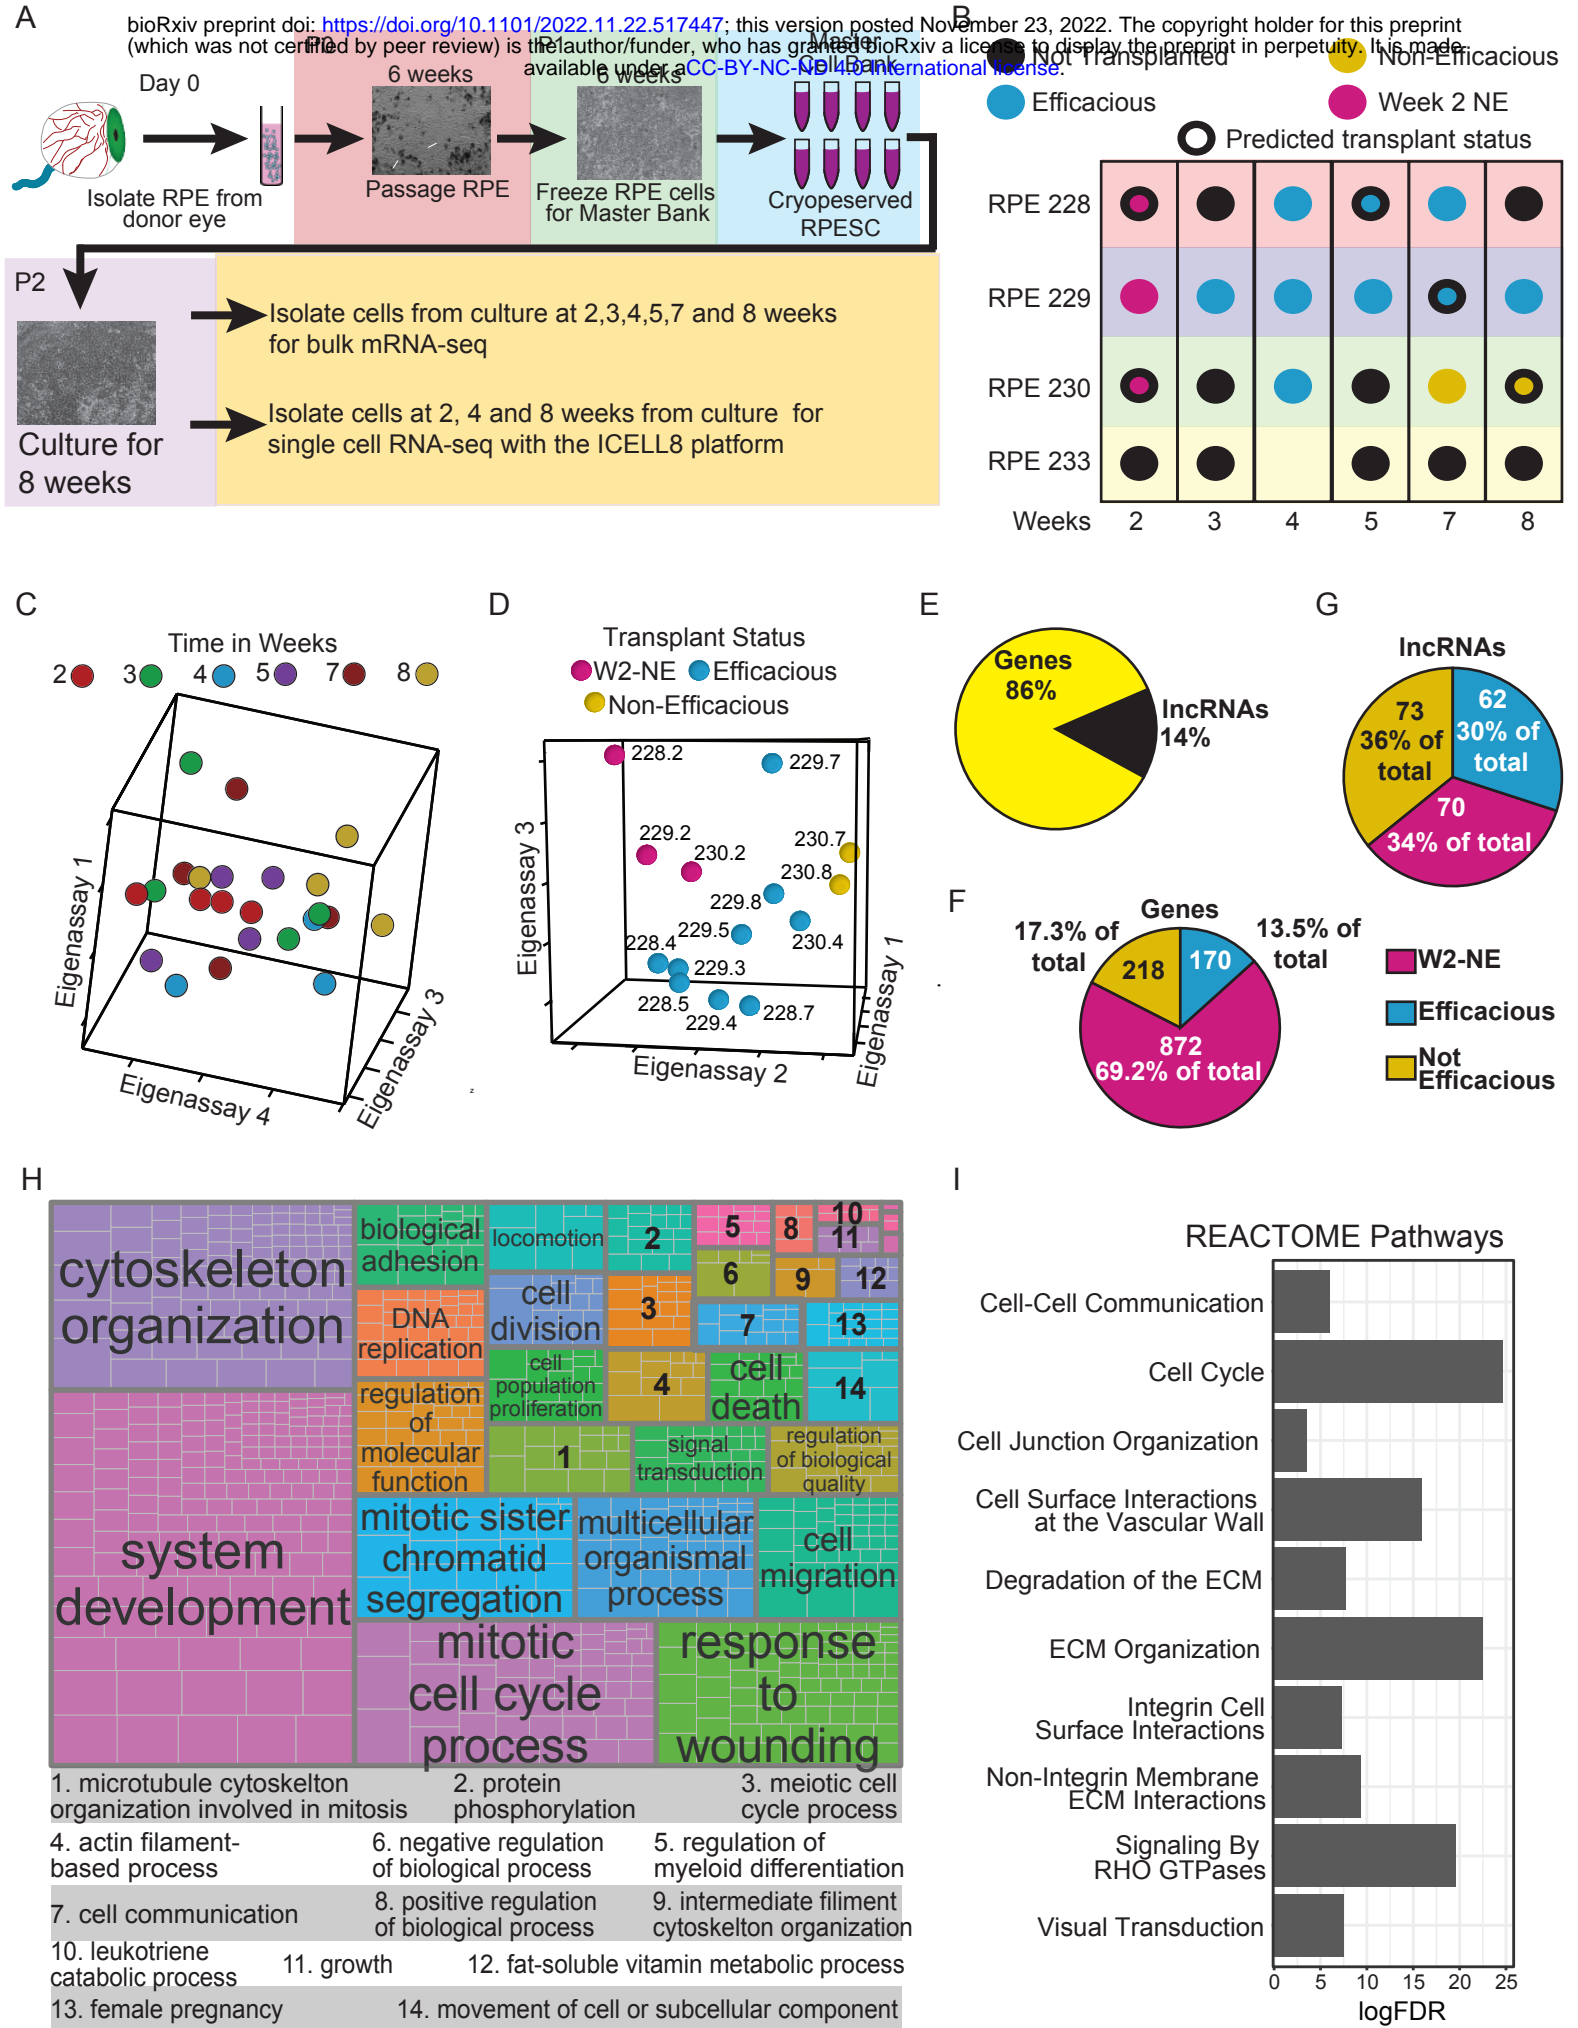

Figure 1



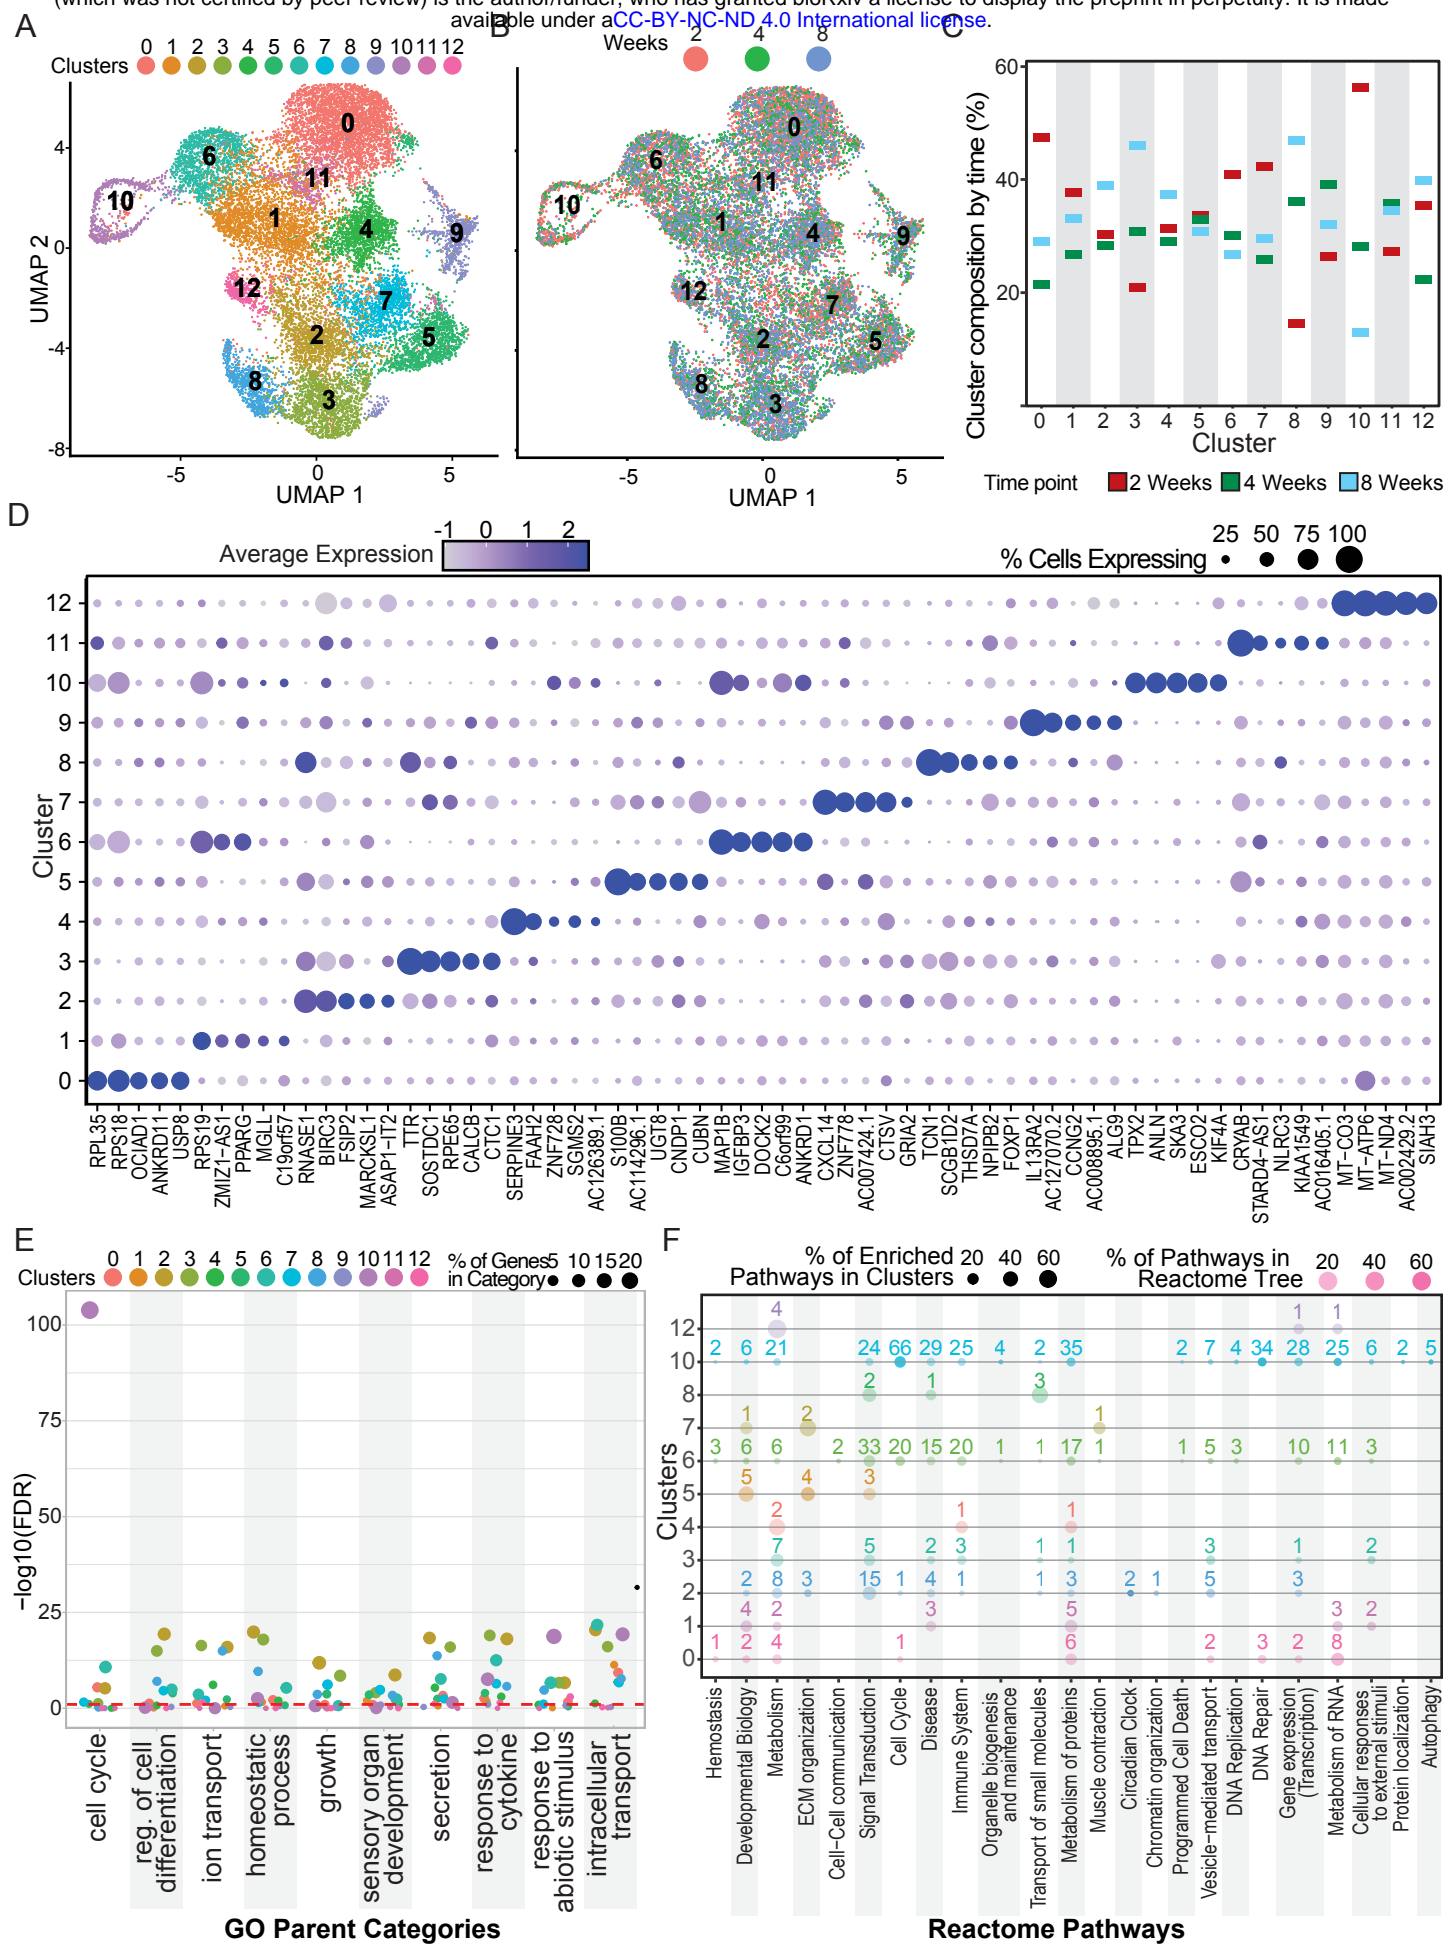

Figure 2

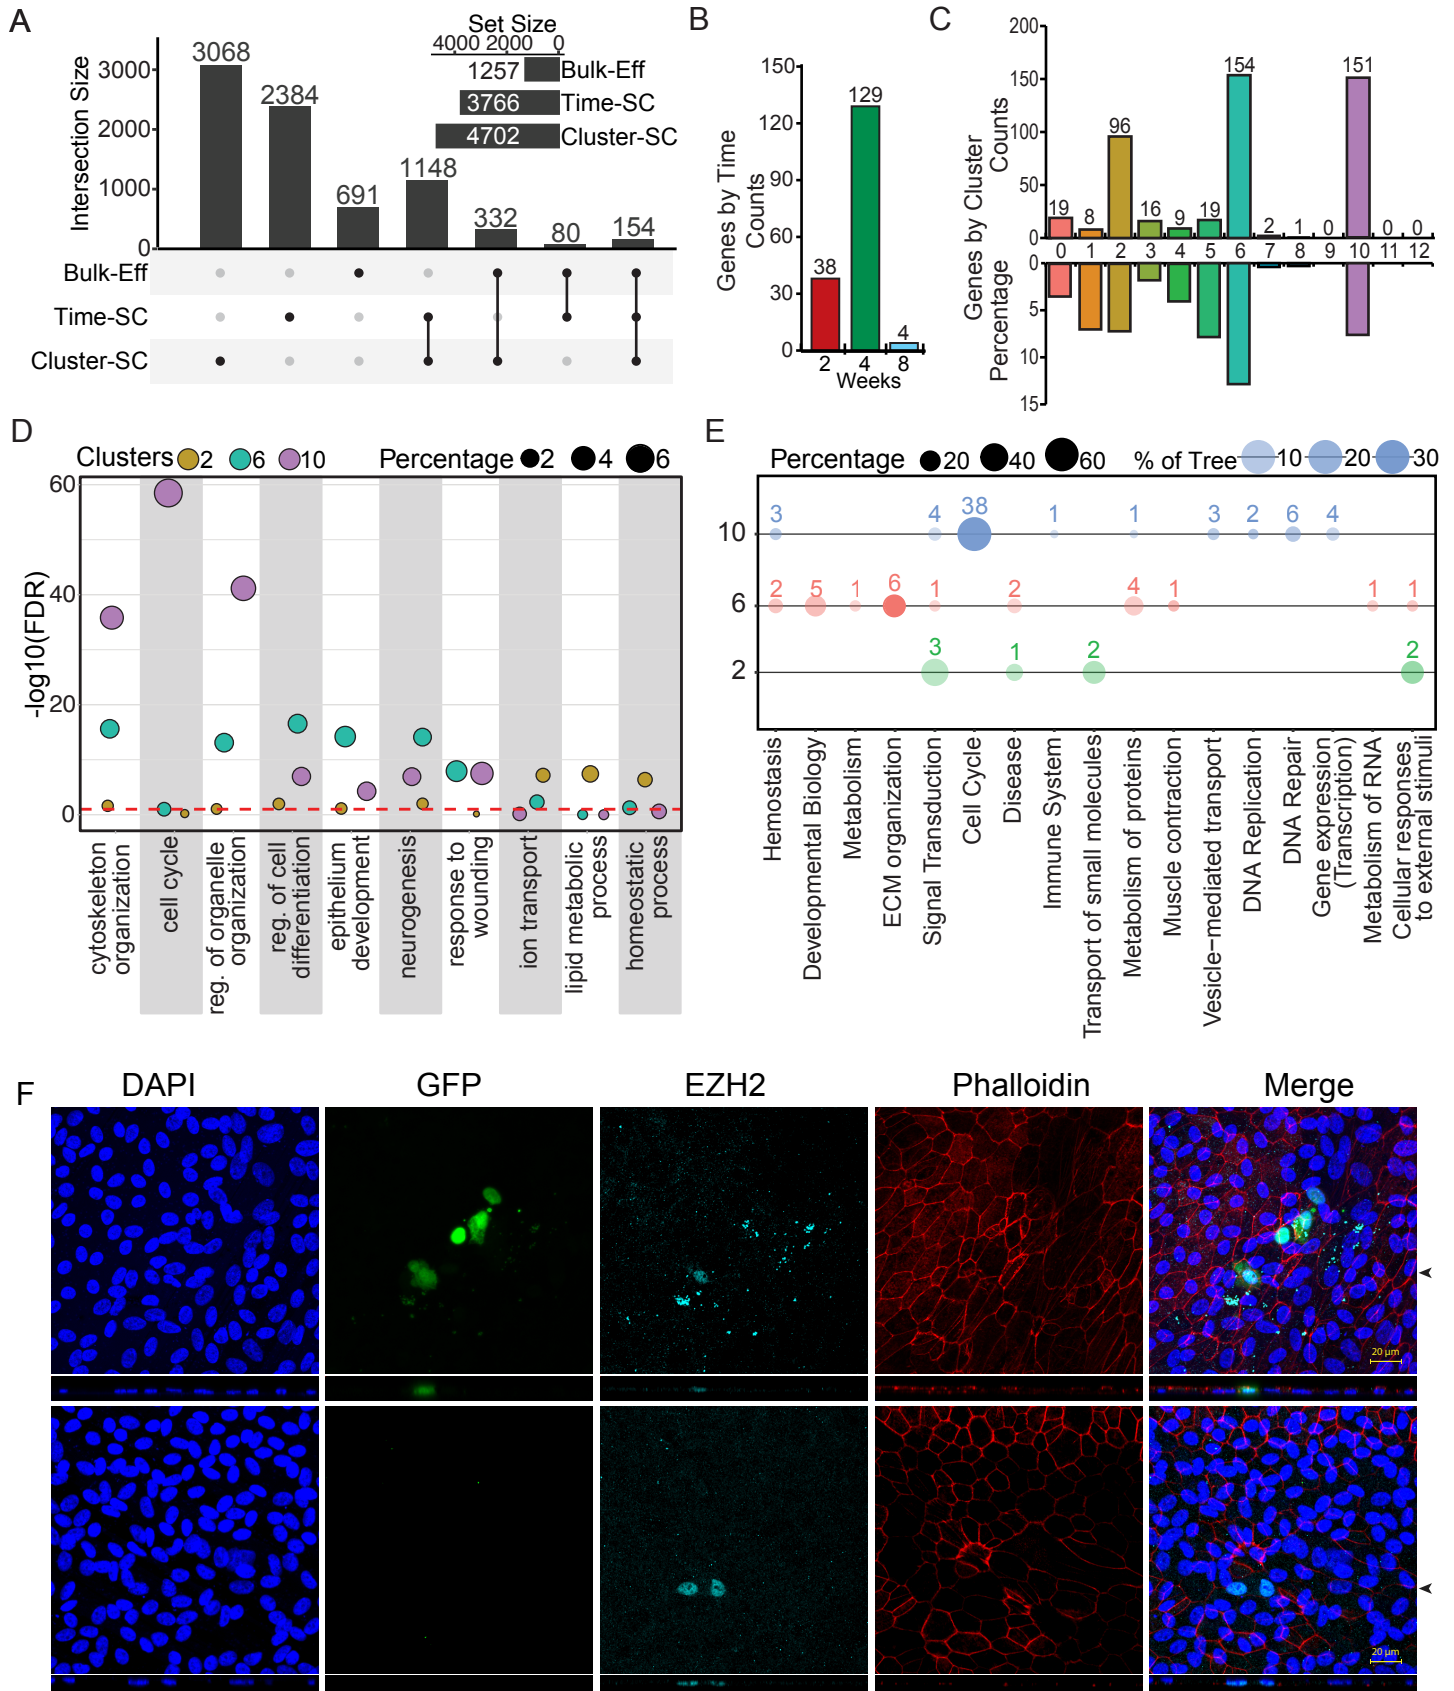

Figure 3

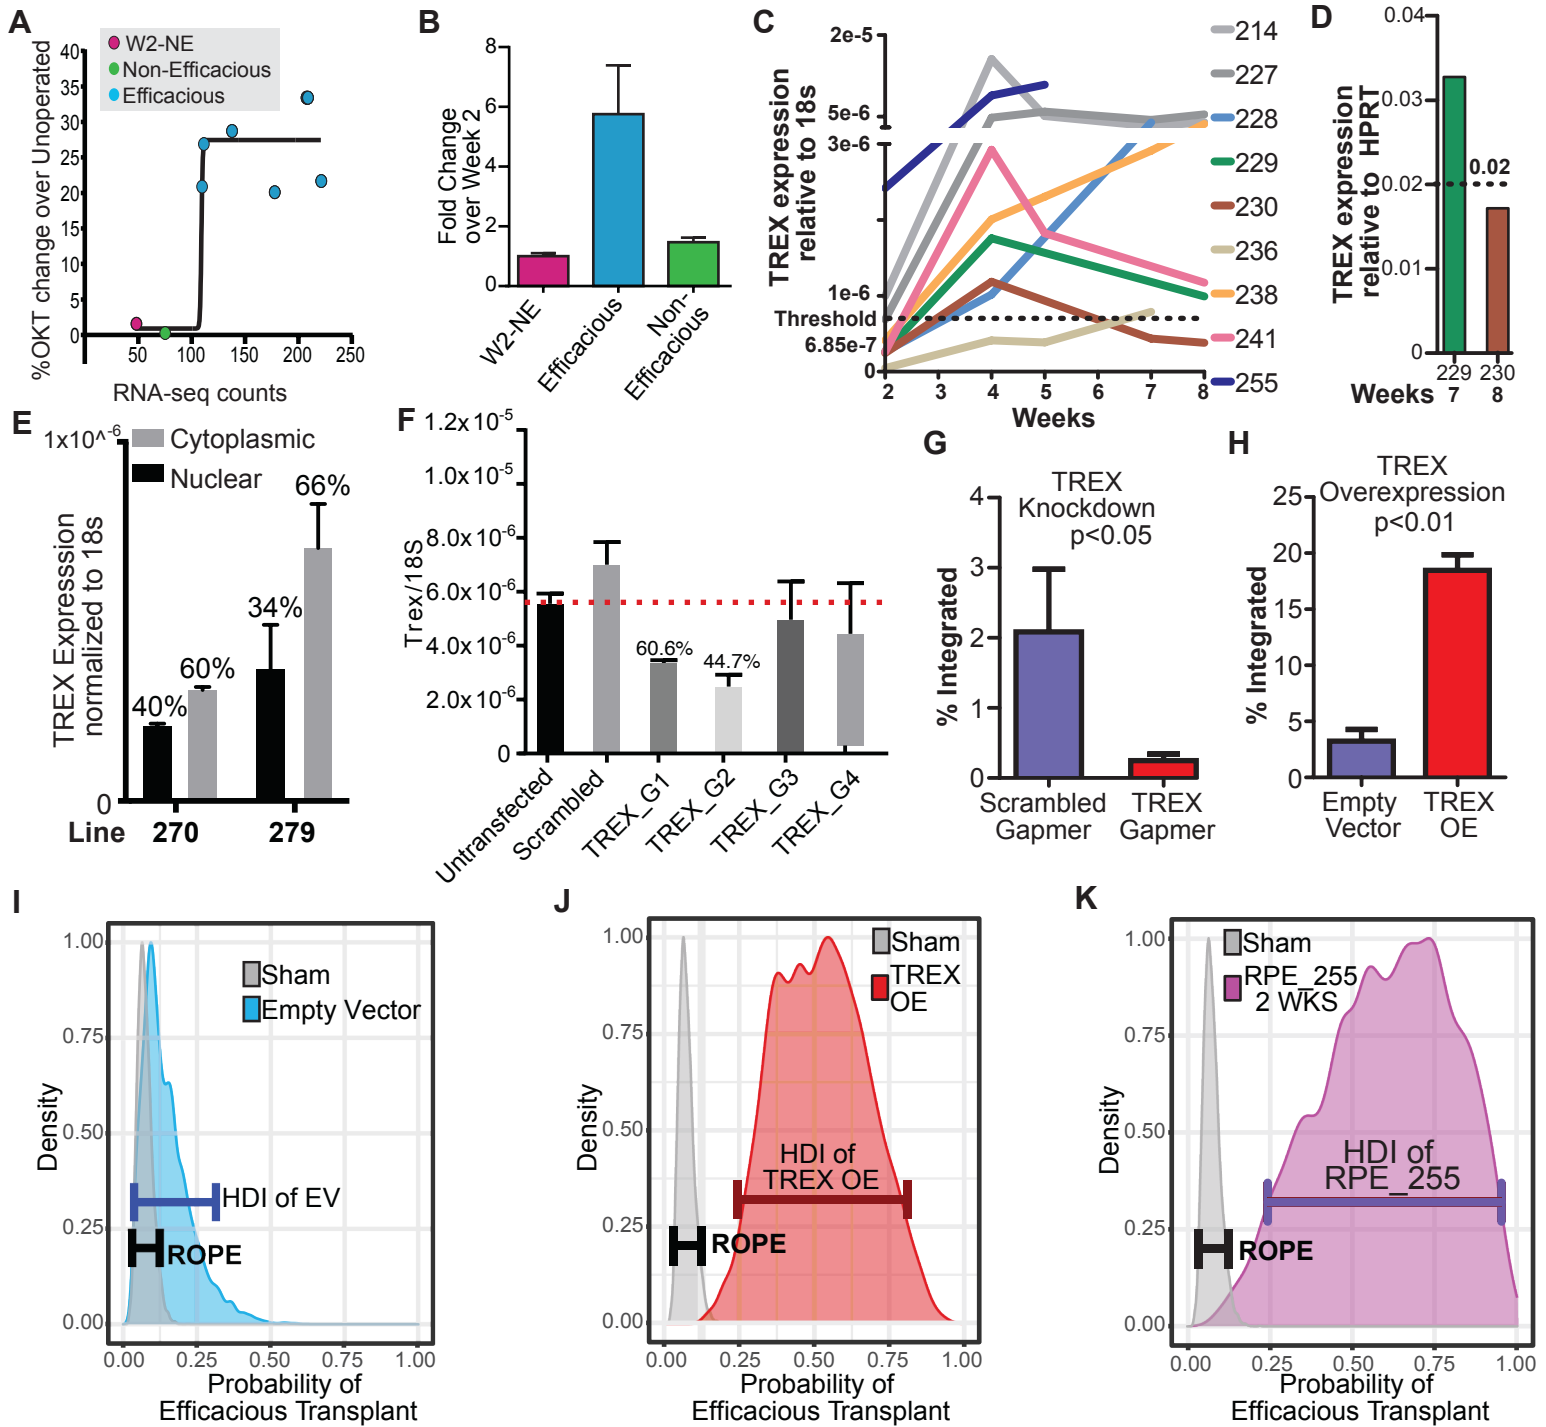

Figure 4

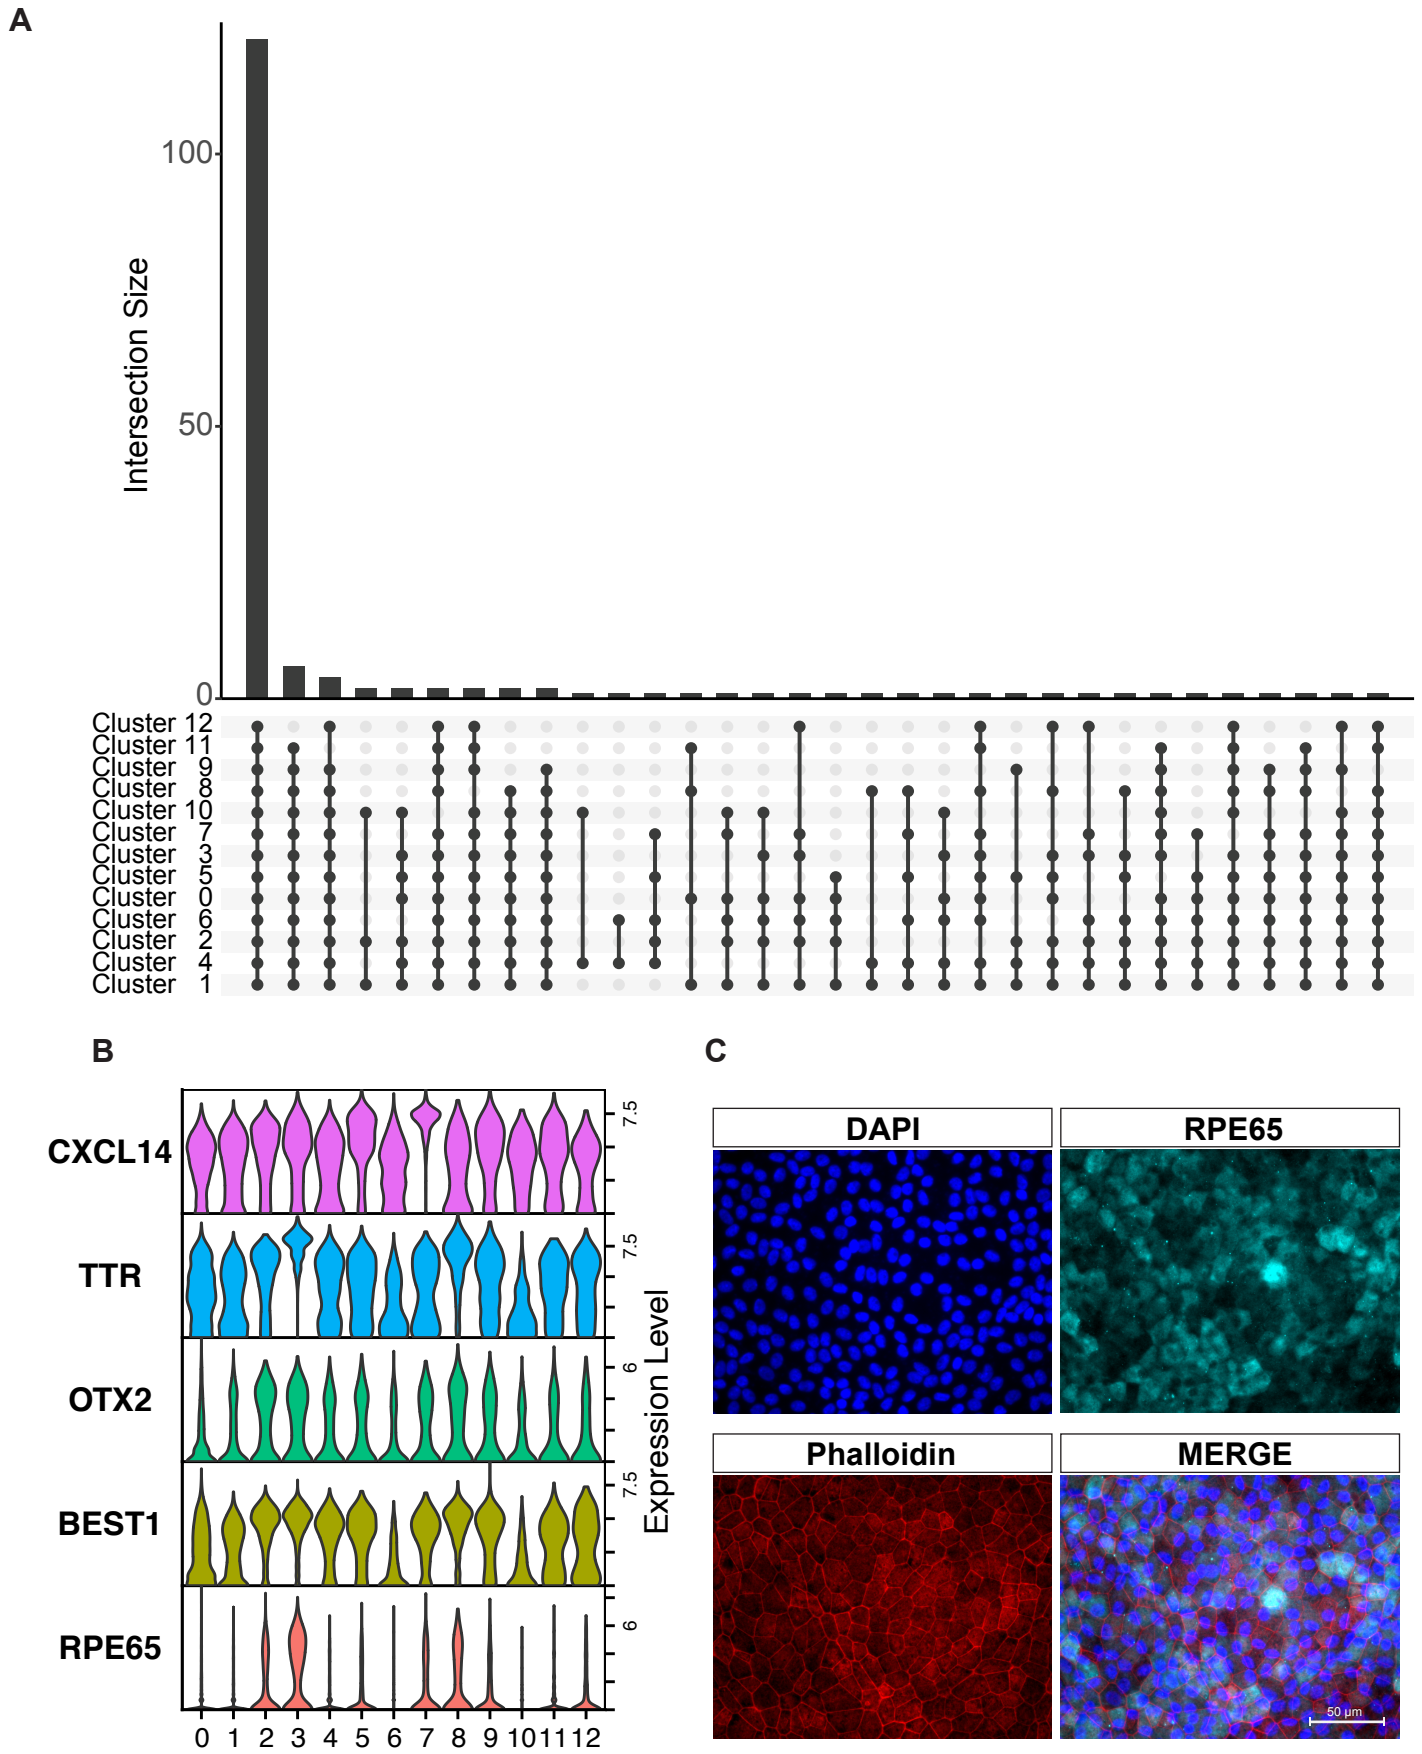

**Figure S1. Expression of RPE related genes.** (A) Intersection of RPE signature genes with genes expressed in each cluster. (B) Select gene expression using simplified violin plots. (C) Expression of RPE65 in 8-week-old RPE cultures.

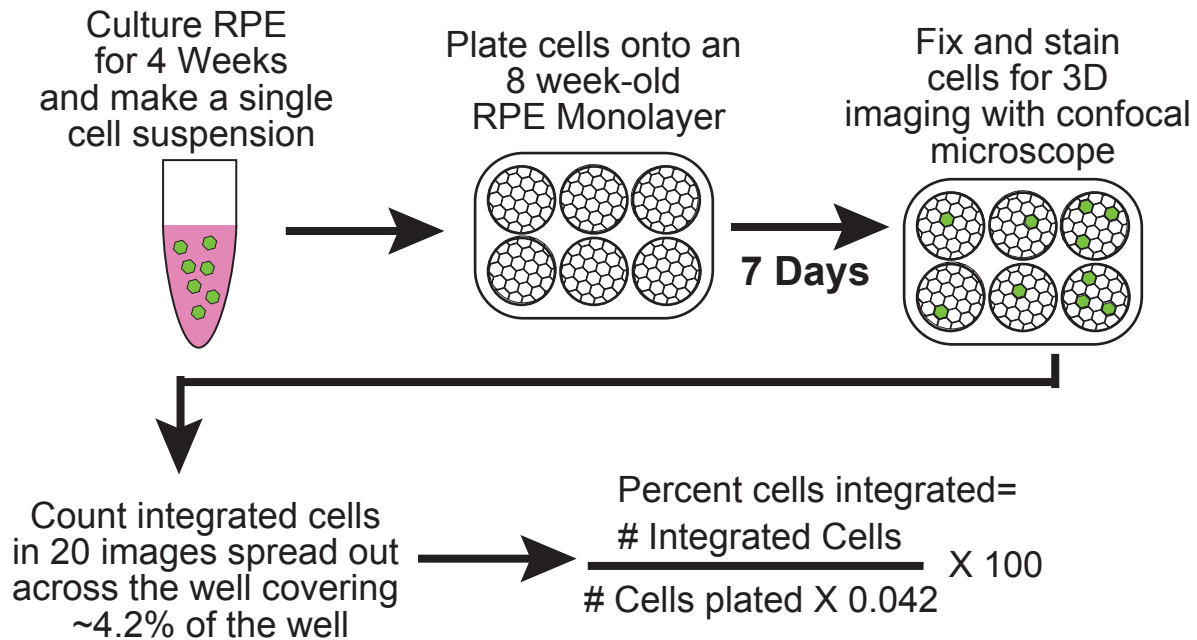

**Figure S2. Outline of Integration Assay.** Description of novel integration assay's experimental design and analysis method.



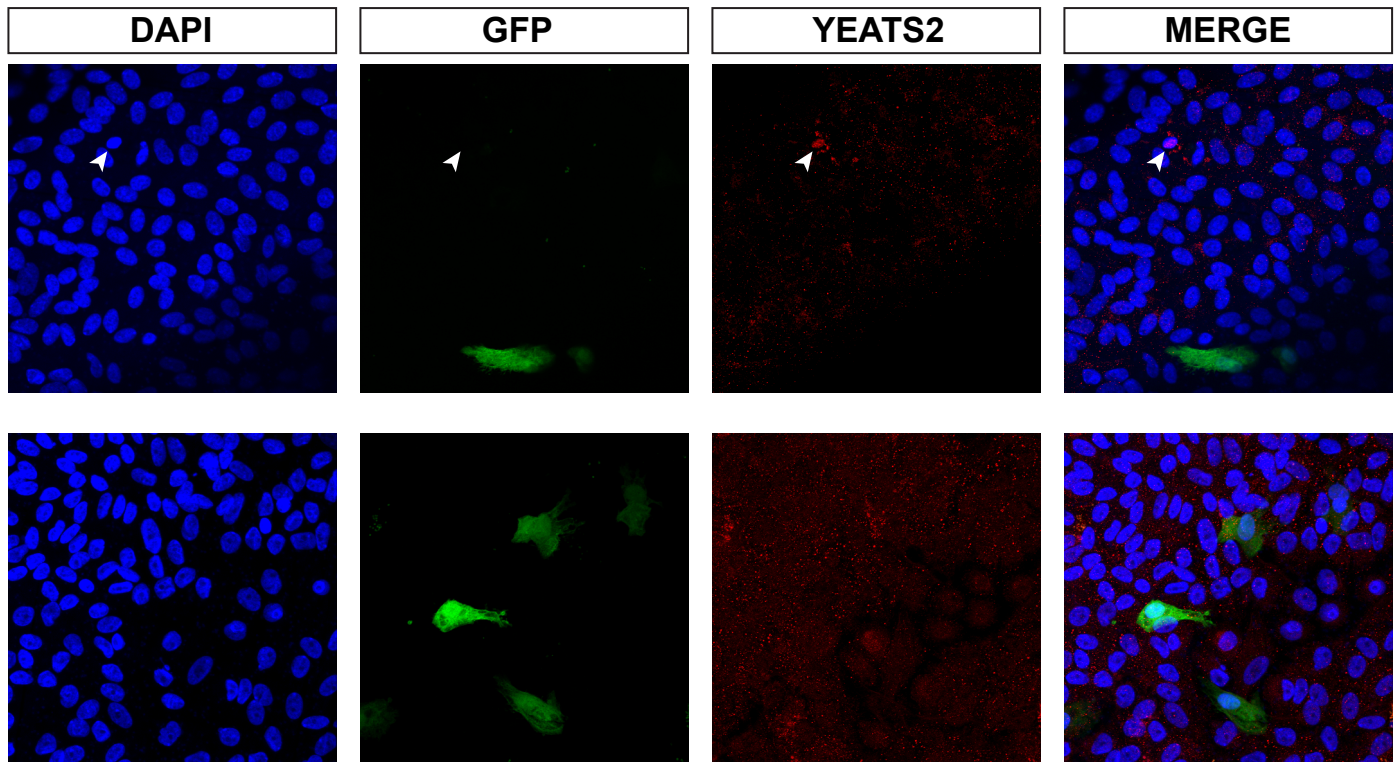

**Figure S3. Expression of YEATS2 in RPE cells.**

YEATS2 was expressed in a subpopulation of 8-week-old RPE cells cultured on Transwells (top row, white arrowhead), but no YEATS2 expression was found in integrated RPE cells labeled with GFP (bottom row).
